1 In culture cross-linking of bacterial cells reveals proteome scale dynamic  
2 protein-protein interactions at the peptide level

3  
4 Luitzen de Jong<sup>1\*</sup>, Edward A. de Koning<sup>1</sup>, Winfried Roseboom<sup>1</sup>, Hansuk Buncherd<sup>3</sup>, Martin  
5 Wanner<sup>2</sup>, Irena Dapic<sup>2</sup>, Petra J. Jansen<sup>2</sup>, Jan H. van Maarseveen<sup>2</sup>, Garry L. Corthals<sup>2</sup>, Peter J.  
6 Lewis<sup>4\*</sup>, Leendert W. Hamoen<sup>1\*</sup> and Chris G. de Koster<sup>1\*</sup>

7 <sup>1</sup>Swammerdam Institute for Life Sciences, and <sup>2</sup>Van't Hoff Institute of Molecular Science,  
8 University of Amsterdam, 1098 XH Amsterdam, The Netherlands. <sup>3</sup>Faculty of Medical  
9 Technology, Prince of Songkla University, Hatyai, Songkhla 90110, Thailand. <sup>4</sup>School of  
10 Environmental and Life Sciences, University of Newcastle, Callaghan, NSW 2308, Australia.

11 \*, Correspondence should be addressed to L. de J: [l.dejong@uva.nl](mailto:l.dejong@uva.nl), P.J.L:

12 [peter.lewis@newcastel.edu.nl](mailto:peter.lewis@newcastel.edu.nl), L.W.H.: [l.w.hamoen@uva.nl](mailto:l.w.hamoen@uva.nl), C.G. de K.: [c.g.dekoster@uva.nl](mailto:c.g.dekoster@uva.nl)

13  
14 **Abstract**

15 Identification of dynamic protein-protein interactions at the peptide level on a proteomic  
16 scale is a challenging approach that is still in its infancy. We have developed a system to  
17 cross-link cells directly in culture with the special lysine cross-linker bis(succinimidyl)-3-  
18 azidomethyl-glutarate (BAMG). We used the Gram positive model bacterium *Bacillus subtilis*  
19 as an exemplar system. Within 5 min extensive intracellular cross-linking was detected, while  
20 intracellular cross-linking in a Gram-negative species, *Escherichia coli*, was still undetectable  
21 after 30 min, in agreement with the low permeability in this organism for lipophilic  
22 compounds like BAMG. We were able to identify 82 unique inter-protein cross-linked  
23 peptides with less than a 1% false discovery rate by mass spectrometry and genome-wide  
24 data base searching. Nearly 60% of the inter-protein cross-links occur in assemblies involved

1 in transcription and translation. Several of these interactions are new, and we identified a  
2 binding site between the  $\delta$  and  $\beta'$  subunit of RNA polymerase close to the downstream DNA  
3 channel, providing a clue into how  $\delta$  might regulate promoter selectivity and promote RNA  
4 polymerase recycling. Our methodology opens new avenues to investigate the functional  
5 dynamic organization of complex protein assemblies involved in bacterial growth.

6

## 7 INTRODUCTION

8 Understanding how biological assemblies function at the molecular level requires knowledge  
9 of the spatial arrangement of their composite proteins. Chemical protein cross-linking  
10 coupled to identification of proteolytic cross-linked peptides by mass spectrometry (CX-MS)  
11 has been successfully used to obtain information about the 3D topology of isolated protein  
12 complexes (1). In this approach, the amino acid sequences of a cross-linked peptide pair  
13 reveal the interacting protein domains. The continued increase in peptide identification  
14 sensitivity by improved MS techniques and equipment has opened the door to proteome-  
15 wide protein interaction studies by cross-linking living cells. Such a systems-level view on  
16 dynamic protein interactions would be a tremendously powerful tool to study cell biology.

17 The only large scale *in vivo* CX-MS studies with bacteria thus far have been performed  
18 with four Gram-negative species and have provided valuable data about the 3D topology of  
19 outer membrane and periplasmic protein complexes (2-5). However, with less than 1% of  
20 the total dataset of cross-linked peptides, the fraction of detected interactions between  
21 known soluble cytoplasmic proteins was underrepresented (2, 3), possibly caused by poor  
22 membrane permeability of the relatively large cross-linker used in these studies, by the  
23 barrier formed by the outer membrane and periplasmic space, or by repeated washing and

1 buffer exchange steps before cross-linking that may have led to dissociation of transient  
2 interactions. We also noted biological inconsistencies in these studies as several tens of  
3 cross-links revealed interactions between soluble cytoplasmic proteins and outer membrane  
4 proteins (3) suggesting some cell lysis occurred during the harvesting/washing stages prior to  
5 cross-linking. These results show that identification of *bone fide* interactions between  
6 cytoplasmic proteins is a non-trivial issue that has not yet been satisfactorily solved.

7         Here we describe a system that fulfills all requirements for efficient trapping and  
8 identification of both stable and dynamic protein-protein interactions in the cytoplasm of  
9 living cells. We used the Gram positive model *Bacillus subtilis*, widely studied for processes  
10 guided by dynamic protein-protein interactions involved in gene expression, cell division,  
11 sporulation and germination (6). Cross-linking was accomplished by a previously designed  
12 reagent, bis(succinimidyl)-3-azidomethyl-glutarate (BAMG) (Figure 1, Supporting  
13 Information)(7). This bifunctional N-hydroxysuccinimidyl ester covalently links juxtaposed  
14 lysine residues on protein surfaces *via* two amide bonds bridged by a spacer of 5 carbon  
15 atoms. The relatively short spacer results in high-resolution cross-link maps. A cross-linker  
16 with the same spacer length and similar hydrophobicity, disuccinimidyl glutarate (DSG)  
17 (Figure 1, Supporting Information), is membrane permeable and has been used before for  
18 cross-linking in living human cells (8). Importantly, to prevent dissociation of transient  
19 intracellular protein interactions by washing and medium change, we added the cross-linker  
20 directly in the culture medium containing a low concentration of primary amines to minimize  
21 reaction with and quenching of the cross-linker.

22         A main limitation of proteome-wide cross-linking studies is the identification of cross-  
23 linked peptides in total cell extracts. This is facilitated both by separation of cross-linked  
24 peptides from the bulk of unmodified species and by determination of the masses of the two

1 linked peptides. To this end BAMG provides the cross-linked peptides with additional  
2 chemical properties that greatly facilitate cross-link identification by virtue of the presence  
3 of a 3-azidomethylene group in the spacer domain. The azido group can be reduced to an  
4 amine group, enabling isolation of the low abundant cross-linked peptides by two-  
5 dimensional strong cation exchange chromatography (9). In addition, chemical reduction  
6 renders the two cross-link amide bonds of BAMG-cross-linked peptides scissile in the gas  
7 phase by collision-induced dissociation, in a way that the masses of the two composite  
8 peptides can be determined from an MS/MS spectrum, thereby facilitating peptide  
9 identification by searching an entire genomic database (10). Identification of cross-linked  
10 peptides from a single MS/MS spectrum provides BAMG with a large advantage over the two  
11 other cleavable reagents used up to now that require multi-stage tandem mass  
12 spectrometry to map cross-links formed *in vivo* (3, 11). To obtain sufficient cross-linked  
13 material by labeling directly in culture, adequate amounts of cross-linker are necessary, and  
14 in this report we also include a scalable new synthesis route for BAMG.

15       Using our novel *in vivo* crosslinking procedure, we were able to detect several  
16 transient protein-protein interactions at the peptide level in *B. subtilis* cells. Many of the  
17 inter-protein crosslinks could be corroborated by structural data from previous studies, but  
18 other crosslinks represent new interactions. A cross-link revealing the binding site between  
19 the  $\beta'$  and  $\delta$  subunits of RNA polymerase (RNAP) demonstrates the power of *in vivo* cross-  
20 linking directly in the culture medium to obtain insight into the molecular mechanisms of  
21 action of complex dynamic assemblies active in growing cells. This approach can be readily  
22 modified to allow the identification of less abundant protein complexes or to investigate in  
23 depth the dynamic assembly of specific protein complexes.

24

## 1 EXPERIMENTAL PROCEDURES

### 2 Synthesis of BAMG

#### 3 Scheme 1. Formation of BAMG

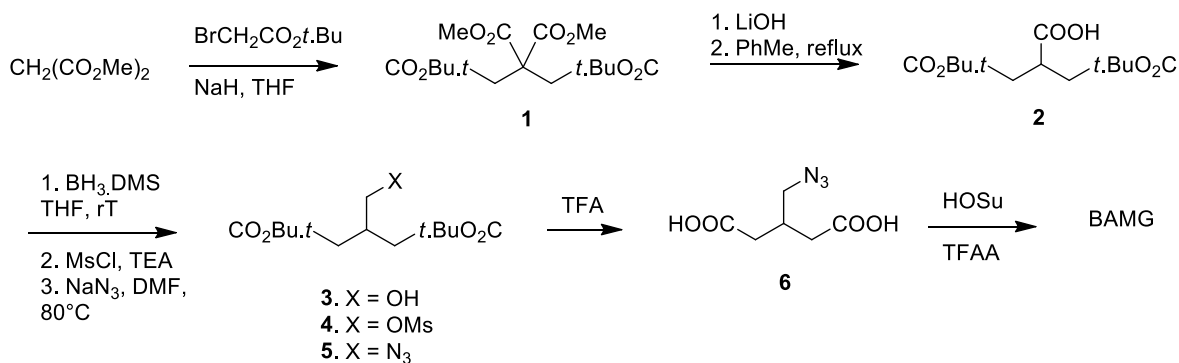

4

#### 5 Tetra-ester 1.

6 Dimethyl malonate (3.42 ml, 30 mmol) was added dropwise to a stirred suspension of  
7 sodium hydride (60% dispersion in oil, 2.46 g, 66.0 mmol) in THF (120 ml) at RT. After stirring  
8 for 45 minutes *tert*.butyl bromoacetate (9.45 ml, 64 mmol) was added dropwise. The  
9 reaction was stirred for 16 h, cooled in ice, and the excess sodium hydride was carefully  
10 neutralized with acetic acid (ca 6 mmol). Extractive workup with sat. aqueous  $\text{NH}_4\text{Cl}$  and  
11 ether, drying over  $\text{MgSO}_4$  and evaporation gave tetra-ester **1** as an oil (quantitative) which  
12 was immediately used for the next step.  $^1\text{H-NMR}$  (400 MHz,  $\text{CDCl}_3$ ):  $\delta$  3.77 (s, 6H); 3.06 (s,  
13 4H); 1.45 (s, 18H).

14

#### 15 Carboxylic acid 2.

16 A solution of tetra-ester **1** (30 mmol) in THF (150 ml) and methanol (40 ml) was diluted with  
17 a solution of lithium hydroxide (2.94 g, 70 mmol) in water (150 ml) and refluxed for 2 h. After  
18 removal of the organic solvents *in vacuo* the aqueous layer was extracted with a 1 : 1  
19 mixture of diethyl ether and PE 40/60. Acidification of the water layer (pH ca 1), extraction

1 with diethyl ether, drying with MgSO<sub>4</sub> and evaporation gave a mixture of mono- and di-  
2 carboxylic acids. This mixture was refluxed in toluene (150 ml) for 2 h. Evaporation of the  
3 toluene gave carboxylic acid **2** (5.5 gr, 19.1 mmol, 64% from dimethyl malonate) as a slowly  
4 solidifying oil. <sup>1</sup>H-NMR (400 MHz, CDCl<sub>3</sub>): δ 3.23 (m, 1H); 2.68 (dd, 1H, *J* = 7.2, *J* = 16.6 Hz);  
5 2.54 (dd, 1H, *J* = 6.2, *J* = 16.6 Hz); 1.46 (s, 18H). <sup>13</sup>C-NMR (100 MHz, CDCl<sub>3</sub>): δ 179.7, 170.4,  
6 81.1, 37.5, 36.2, 27.8; IR (film, cm<sup>-1</sup>): 3200, 1728, 1711 cm<sup>-1</sup>.

7

### 8 *Alcohol 3.*

9 Borane dimethylsulfide (1.45 ml, 15 mmol) was added dropwise to a solution of carboxylic  
10 acid **2** (1.3 g, 4.5 mmol) in anhydrous THF (30 ml) at 0 °C. The reaction was stirred at RT for  
11 16 h and carefully quenched with saturated aqueous NH<sub>4</sub>Cl and diethyl ether. Extractive  
12 workup and flash chromatography with a mixture of PE 40/60 and ethyl acetate (3 : 1 and 1 :  
13 1) gave alcohol **3** (0.78 gr, 2.85 mmol, 63%) as an oil. <sup>1</sup>H-NMR (400 MHz, CDCl<sub>3</sub>): δ 3.65 (d,  
14 2H, *J* = 5.2 Hz); 2.45 (m, 1H); 2.3 – 2.4 (m, 4H); 1.47 (s, 18H); <sup>13</sup>C-NMR (100 MHz, CDCl<sub>3</sub>): δ  
15 172.1, 80.6, 80.55, 65.0, 64.9, 37.2, 37.1, 34.8, 27.9; IR: 3500, 1726 cm<sup>-1</sup>. IR (film, cm<sup>-1</sup>): 3500,  
16 1726.

17

### 18 *Mesylate 4.*

19 Methanesulfonyl chloride (0.255 ml, 3.3 mmol) was added dropwise to a solution of alcohol  
20 **3** (0.78 g, 2.85 mmol) and triethylamine (0.526 ml, 4.0 ml) in anhydrous dichloromethane (20  
21 ml) at 0 °C. After stirring for 1 h at 0 °C the reaction was diluted with diethyl ether (ca 50 ml)  
22 and quenched with water. Extractive workup gave mesylate **4** (1.0 g, 2.84 mmol,  
23 quantitative). <sup>1</sup>H-NMR (400 MHz, CDCl<sub>3</sub>): δ 4.31 (d, 2H, *J* = 5.1 Hz); 2.67 (m, 1H); 2.35 – 2.47  
24 (m, 4H); 1.47 (m, 18H); <sup>13</sup>C-NMR (100 MHz, CDCl<sub>3</sub>): δ 170.6, 80.9, 80.85, 71.1, 36.95, 35.9,

1 31.9, 27.9; IR (film,  $\text{cm}^{-1}$ ): 1725.

2

3 *Azide 5.*

4 A mixture of mesylate **4** (1.0 g, 2.84 mmol) and sodium azide (0.554 g, 8.5 mmol) in  
5 anhydrous DMF (10 ml) was stirred at 85 °C for 3 h. Extractive workup with water and diethyl  
6 ether, followed by chromatography (PE 40/60 : ethyl acetate 6 : 1) gave pure azide **5** (0.84 g,  
7 2.8 mmol, 98% from **3**).  $^1\text{H-NMR}$  (400 MHz,  $\text{CDCl}_3$ ):  $\delta$  3.44 (d, 2H,  $J = 5.7$  Hz); 2.50 (m, 1H); 2.3  
8 – .45 (m, 4H); 1.48 (s, 18H);  $^{13}\text{C-NMR}$  (100 MHz,  $\text{CDCl}_3$ ):  $\delta$  170.8, 80.6, 54.1, 32.4, 27.9; IR  
9 (film,  $\text{cm}^{-1}$ ): 2102, 1728.

10

11 *3-(Azidomethyl)-glutaric acid 6.*

12 Azide **5** (0.638 g, 2.13 mmol) was stirred in a mixture of dichloromethane (16 ml) and  
13 trifluoroacetic acid (4 ml) for 6 h at RT. Toluene (30 ml) was added and the solvents were  
14 removed *in vacuo*. Drying of the resulting glass (0.02 mbar, 50 °C) gave pure di-acid **6** in  
15 quantitative yield.  $^1\text{H-NMR}$  (400 MHz,  $\text{CDCl}_3 + 10\% \text{CD}_3\text{OD}$ ):  $\delta$  3.44 (d, 2H,  $J = 5.7$  Hz);  $^{13}\text{C-}$   
16  $\text{NMR}$  (100 MHz,  $\text{CDCl}_3 + 10\% \text{CD}_3\text{OD}$ ):  $\delta$  176.2, 54.0, 35.7, 31.8; IR (film,  $\text{cm}^{-1}$ ): 3100 (broad),  
17 2103, 1708.

18

19 **BAMG**: *Bis(succinimidyl) 3-azidomethyl-glutarate.*

20 This step was carried out according to a described procedure (12) Trifluoroacetic anhydride  
21 (1.4 ml) was added to a solution of di-acid **6** (0.415 g, 2.1 mmol) and *N*-hydroxysuccinimide  
22 (1.15 g, 10.0 mmol) in a mixture of dichloromethane (8 ml) and anhydrous pyridine (4 ml) at  
23 0 °C. The cooling bath was removed and stirring was continued for 1.5 h. The reaction  
24 mixture was diluted with dichloromethane, and extracted with three 50 ml portions of 1M

1 HCl and finally with NaHCO<sub>3</sub> (2 x 50 ml). Drying over MgSO<sub>4</sub>, evaporation of the solvent and  
2 drying (0.02 mbar, 40 °C) gave BAMG (0.76 g, 2.0 mmol, 95%) as a slightly yellow syrup.  
3 BAMG was stored at -80 °C. Before storage, BAMG was dissolved in acetonitrile, divided in  
4 aliquots and dried by vacuum centrifugation. <sup>1</sup>H-NMR (400 MHz, CDCl<sub>3</sub>): δ 3.65 (d, 2H, *J* = 5.5  
5 Hz); 2.83 – 2.90 (m, 12H), 2.75 (m, 1H); <sup>13</sup>C-NMR (100 MHz, CDCl<sub>3</sub>): δ 169.0, 166.6, 52.5,  
6 32.3, 32.2, 25.4; IR (film, cm<sup>-1</sup>): 2108, 18,14, 1783, 1735.

7

## 8 **Growth of bacteria**

9 *B. subtilis* strain 168 (*trp*<sup>-</sup>) was grown in a MOPS minimal medium (13) modified as described  
10 for *B. subtilis* (14) and supplemented with 0.2 % glucose, 1.2 mM glutamine and 0.2 mM  
11 tryptophan. To obtain an exponentially growing culture for cross-linking, streaks from a  
12 glycerol stock of cells grown on liquid LB medium were first put on an LB agar plate.  
13 Following overnight growth at 37°C a single colony was suspended in 10 ml minimal medium  
14 in 100 ml culture flasks. From the suspension, dilutions were made into 10 ml minimal  
15 medium for overnight growth in 100 ml flasks placed at 37°C in a water bath shaking at 240  
16 rpm. An overnight culture in mid exponential growth as determined by an OD<sub>600 nm</sub> = 0.3-0.5  
17 was used for dilution to OD<sub>600 nm</sub> = 0.01 in pre-warmed minimal medium in Erlenmeyer flasks  
18 to obtain exponentially growing cultures for cross-linking. *Escherichia coli* strain MC4100 was  
19 cultured in MOPS medium supplemented with 0.16% (w/v) glucosamine and 0.1 mM NH<sub>4</sub>Cl.  
20 To obtain an exponentially growing culture for cross-linking, an overnight culture in this  
21 growth medium was 40 times diluted in fresh medium to an OD<sub>600 nm</sub> = 0.08.

22

## 23 **Cross-linking *in vivo***

24 In exponentially growing *B. subtilis* cultures at OD<sub>600 nm</sub> = 0.45 – 0.50, cross-linking was



1 started by the addition of 2.0 mM BAMG from a freshly prepared stock solution of 1 M in  
2 DMSO. A magnetic stirrer was used for rapid mixing with the culture. Cross-linking was for 5  
3 min in the shaking water bath at 37°C. The cross-linking reaction was quenched by the  
4 addition of 1M Tris-Cl (pH 8.0) to a final concentration of 50 mM. Cross-linked cells were  
5 harvested by centrifugation for 5 min at 4000 g and cell pellets were stored frozen at -20°C.

6

7 Exponentially growing *Escherichia coli* cells were cross-linked at  $OD_{600\text{ nm}} = 0.7$ ,  
8 corresponding to 0.21  $\mu\text{g}$  dry weight per ml (15), with 2 mM BAMG for 5, 10 and 30 min. The  
9 cross-linking reaction was quenched by the addition of 50 mM Tris-Cl (pH 8.0). We assess  
10 that 2.76 mM glucose, formed from an equivalent amount of N-acetylglucosamine (16), has  
11 been consumed for energy and biomass production at the time of cross-linking (13).

12 Deamination of glucosamine, after deacetylation of N-acetylglucosamine, results in the  
13 formation of an equivalent amount of  $\text{NH}_4^+$  of which 1.88 mM  $\text{NH}_4^+$  has been consumed for  
14 biomass production (13). This implies that the culture contains 0.88 mM free  $\text{NH}_4^+$  that can  
15 react with BAMG, leaving 1.12 mM BAMG for protein cross-linking. Cross-linked cells were  
16 harvested by centrifugation for 5 min at 4000 g and cell pellets were stored frozen at -20°C.

17

## 18 **Protein extraction**

19 Frozen *B. subtilis* cell pellets from 2-40 ml culture medium were resuspended in 1 ml of a  
20 solution containing 10 mM Tris-HCl and 0.1 mM EDTA (pH 7.5). Cell suspensions of 1 ml in 2  
21 ml propylene Eppendorf vials placed in ice water were lysed by sonication with a micro tip,  
22 mounted in an MSE ultrasonic integrator operated at 21 Hz and amplitude setting 3, in 6  
23 periods of 15 s with 15 s intervals in between. Lysates were centrifuged for 15 min at 16000  
24 g. Supernatants were used for further analysis. Cell extracts from *Escherichia coli* were

1 prepared by suspending cell pellets from 1 ml cultures in SDS-PAGE sample buffer (17)  
2 without  $\beta$ -mercaptoethanol. Suspensions were incubated for 1 h at 60°C and then  
3 centrifuged for 2 min at 13000 g. Proteins were concentrated with 0.5 ml Amicon Ultra 10  
4 kDa cut off centrifugal filters (Millipore) before SDS-PAGE analysis.

5

## 6 **Gel filtration**

7 A cross-linked protein fraction with a size distribution of approx. 400 kDa to 1-2 MDa was  
8 obtained by gel filtration on a Superose 6 10/300 GL column (GE Healthcare) operated on an  
9 Akta FPLC system (GE Healthcare) in a buffer containing 20 mM HEPES pH 7.9, 300 mM KCl,  
10 0.2 mM EDTA, 0.1 mM DTT and 20% glycerol (gel filtration buffer) at a flow rate of 0.5 ml  
11  $\text{min}^{-1}$ . Fractions of 1 ml were collected and snap frozen in liquid nitrogen for storage at -  
12 20°C.

13

## 14 **Protein determination and polyacrylamide gel electrophoresis in the presence of sodium** 15 **dodecyl sulphate (SDS-PAGE)**

16 Protein was measured with the bicinchoninic acid method (18) using a protein assay kit  
17 (Pierce). SDS-PAGE (17) was carried out using 10% or 12% precast Novex gels (Thermo Fisher  
18 Scientific).

19

## 20 **Protein digestion**

21 Pooled gel filtration fractions of extracted cross-linked proteins in the 400 kDa to 1-2 MDa  
22 range were concentrated to about 10 mg protein/ml with 0.5 ml Amicon Ultra 10 kDa cut off  
23 centrifugal filters (Millipore). Prior to digestion, cysteines were alkylated by addition of a  
24 solution of 0.8 M iodoacetamide (Sigma–Aldrich), followed by the addition of solution of 1 M

1 Tris-HCl pH 8.0, 9.6 M urea (Bioreagent grade, Sigma–Aldrich) to obtain final concentrations  
2 of 40 mM iodoacetamide, 0.1 M Tris HCl and 6 M urea, respectively. Incubation was for 30  
3 min at room temperature in the dark. The solution was diluted 6 times by the addition of 0.1  
4 M Tris–HCl pH 8.0 and digested with trypsin (Trypsin Gold, Promega, Madison, WI, USA)  
5 overnight at 30°C at a 1:50 (w/w) ratio of enzyme and substrate. Peptides were desalted on  
6 C18 reversed phase TT3 top tips (Glygen, Columbia, USA), eluted with 0.1% TFA in 50%  
7 acetonitrile and dried in a vacuum centrifuge.

8

### 9 **Diagonal SCX chromatography**

10 A protocol described earlier (9) was used with several modifications. The main difference  
11 was the use of a solution of ammonium formate instead of KCl for salt gradient elution. The  
12 use of the volatile ammonium formate avoids time-consuming desalting steps and prevents  
13 loss of material. Dry desalted peptides (240 µg) were reconstituted with 10 µl of a solution  
14 containing 0.1% TFA and 25% acetonitrile followed by the addition of 0.2 ml 10 mM  
15 ammonium formate and 25% acetonitrile pH 3.0 (buffer A) and 0.2 ml of the mixture was  
16 loaded on a Poly-sulfoethyl aspartamide column (2.1 mm ID, 10 cm length) (Poly LC Inc.,  
17 Columbia, USA) operated on an Ultimate HPLC system (LC Packings, Amsterdam, The  
18 Netherlands). For elution, at a flow rate of 0.4 ml min<sup>-1</sup>, increasing amounts of buffer B (500  
19 mM ammonium formate pH 3.0) were mixed with buffer A, according to the following  
20 scheme. At t = 5 min, 1% buffer B was added, at t = 10 min a linear gradient from 1% to 50%  
21 buffer B was started over 10 min, followed by a gradient from 50% to 100% buffer B over 3  
22 min. Elution with 100% B lasted 2 min after which the column was washed with buffer A for  
23 19 min. A UV detector was used to measure absorbance at 280 nm of the eluent. Peptides  
24 started to elute at t = 14 min and were manually collected in 0.2 ml fractions and lyophilized.

1 For secondary SCX runs, dried cross-linked enriched peptides (fractions 7-16<sup>6</sup>) were dissolved  
2 in 20  $\mu$ l 40 mM TCEP (BioVectra) in 20% acetonitrile and incubated under argon for 2 h at  
3 60°C. The peptide solution was then diluted with 0.19 ml buffer A just before loading for the  
4 secondary SCX runs. Elution occurred under the same conditions as in the primary SCX run.  
5 Material was collected when the absorbance at 280 nm started to rise again (about 30s after  
6 the end of the elution time window of the primary fraction, until it came back to base level  
7 (high salt shifted fraction). Collected eluent was lyophilized.

8

### 9 **LC-MS/MS**

10 Identification of proteins by LC-MS/MS analysis of peptides in SCX fractions with an Amazon  
11 Speed Iontrap with a CaptiveSpray ion source (Bruker) coupled with an EASY-nLC II  
12 chromatographic system (Proxeon, Thermo Scientific) and data processing have been  
13 described in detail before (19).

14 Identification of cross-linked peptides enriched by diagonal SCX chromatography by LC-  
15 MS/MS analysis was performed with an Eksigent Expert nanoLC 425 system connected to  
16 the Nano spray source of a TripleTOF 5600+ mass spectrometer. Peptides were loaded onto  
17 an Eksigent trap column (Nano LC trap set, ChromXP C18, 120 Å, 350  $\mu$ m x 0.5 mm) in a  
18 solution containing 0.1 % TFA, and 2 % acetonitrile and desalted with 3% TFA and 0.1 %  
19 formic acid at 2  $\mu$ L/min. After loading, peptides were separated on an in-house packed 7 cm  
20 long, 75  $\mu$ m inner diameter analytical column (Magic C18 resin, 100 Å pore size, 5  $\mu$ m) at 300  
21 nL/min. Mobile phase A consisted of 0.1% formic acid in water and mobile phase B consisted  
22 of 0.1 % formic acid in acetonitrile. The gradient consisted of 5% B for 5 min, then 5-10 % B  
23 over 10 min, followed by 10-35 % B over 60 min and then the gradient was constant at 80 %  
24 B for 10 min. After each run the column was equilibrated for 20 min at starting conditions.

1 The TripleTOF 5600+ mass spectrometer was operated with nebulizer gas of 6 PSI, curtain  
2 gas of 30 PSI, an ion spray voltage of 2.4 kV and an interface temperature of 150°C. The  
3 instrument was operated in high sensitivity mode. For information-dependent acquisition,  
4 survey scans were acquired in 50 ms in the m/z range 400-1250 Da. In each cycle, 20 product  
5 ion scans were collected for 50 ms in the m/z range 100-1800 Da, if exceeding 100 counts  
6 per seconds and if the charge state was 3+ to 5+. Dynamic exclusion was used for half of the  
7 peak width (15s) and rolling collision energy was used.

8 Before acquisition of two samples the mass spectrometer was calibrated using the built-in  
9 autocalibration function of Analyst 1.7. For MS calibration, 25 fmol of  $\beta$ -galactosidase digest  
10 (Sciex) was injected. For TOF MS calibration, ions with the following m/z values were  
11 selected: 433.88, 450.70, 528.93, 550.28, 607.86, 671.34, 714.85 and 729.40 Da. The ion at  
12 m/z 729.4 Da was selected for fragmentation and product ions were used for TOF MS/MS  
13 calibration.

14 For 27 out of 29 LC-MS/MS runs, average mass deviations from calculated values of  
15 identified components varied from  $-4.0 \pm 2.4$  to  $15.3 \pm 4.1$  ppm. For data processing of  
16 MS/MS (MS1MS2) data by Reang (described below) and database searching of MS/MS  
17 (MS1MS2) data by Mascot, 25 ppm mass tolerance was allowed in these cases for both M1  
18 and MS2. In the two remaining runs average mass deviations of identified components were  
19  $31.9 \pm 12.0$  and  $62.5 \pm 7.8$  ppm, respectively. In these cases, a mass tolerances of 50 ppm  
20 and 75 ppm, respectively, was allowed for both MS1 and MS2

21

## 22 **Data processing**

23 Raw LC- MS1MS2 data were processed with Mascot Distiller and MS2 data were  
24 deconvoluted to  $MH^+$  values at the QStar default settings using the option to calculate

1 masses for 3+ to 6+ charged precursor ions in case the charge state could not be assessed  
2 unambiguously.

3

#### 4 **Identification of candidate cross-linked peptides**

5 For cross-link identification using the entire *B. subtilis* sequence database, a software tool  
6 named Reang (10) was used for further MS1MS2 data processing. The rationale of the  
7 processing by Reang described below is based on the notion that an MS1MS2 spectrum of  
8 BAMG-cross-linked peptides provides both the information for the masses of the candidate  
9 composing peptides as well as the fragment ions for identification of the composing  
10 peptides. In brief, Reang identifies precursor ions with mass > 1500 Da, potentially  
11 corresponding to a BAMG-cross-linked peptide pair A and B with the azide reduced to an  
12 amine, showing evidence for cleavage of the cross-linked amide bonds in the presumed  
13 cross-link. Such cleavage events result in product ions of the unmodified peptides A and B  
14 and in modified peptides Am and Bm fulfilling the following mass relationships

15  $M_{Am} - M_A = M_{Bm} - M_B = 125.0477$  (equation 1)

16  $M_A + M_{Bm} = M_{Am} + M_B = M_P$  (equation 2)

17 where  $M_{Am}$  and  $M_{Bm}$ , resp., are the masses of peptides A and B modified with the remnant m  
18 of the cross-linker in the form of a  $\gamma$ -lactam with elemental composition  $C_6H_7NO_2$ ,  
19 corresponding to a mass of 125.0477 Da,  $M_A$  and  $M_B$  are the masses of peptide A and  
20 peptide B, resp., and  $M_P$  is the mass of the precursor P.

21 Reang identifies among the 30 product ions of highest signal intensity within a mass error of  
22 25-75 ppm (i) pairs of mass values of fragment ions > 500 Da differing 125.0477 Da, i.e., a  
23 candidate A and Am pair or B and Bm pair, (ii) pairs of mass values for A and B fulfilling the  
24 equation  $M_A + M_B + 125.0477 = M_P$ , and (iii) pairs of mass values for Am and Bm fulfilling the

1 equation  $M_{Am} + M_{Bm} - 125.0477 = M_P$ . The mass values of the other pairs in the cases (i), (ii)  
2 and (iii) are calculated from eq. 1 and eq. 2.  
3 MS1 values of entries in the MS1MS2 data files with MS2 data fulfilling at least one of the  
4 equations 1 or 2 are replaced by MS1 values corresponding to  $M_A$ ,  $M_{Am}$ ,  $M_B$  and  $M_{Bm}$ .  
5 Furthermore, fragment ions corresponding to  $M_A$ ,  $M_{Am}$ ,  $M_B$  and  $M_{Bm}$  are removed from the  
6 new MS1MS2 entries as well as fragments ions larger than the new MS1 values.  
7 The new MS1MS2 files in pkl format are input for Mascot to nominate candidate peptides  
8 for A, Am, B and Bm by interrogating the *B. subtilis* strain 168 database containing both  
9 forward and reversed sequences. Reang combines the nominated peptides with a Mascot  
10 score  $\geq 1$  into candidate cross-linked peptides and assigns these candidates with a mass  
11 tolerance of 25-75 ppm to precursor ions in the original MS1MS2 data file. Candidates are  
12 validated based on the original MS1MS2 data files. The principle of our approach is that an  
13 MS1MS2 spectrum of cross-linked peptides provides both the information for the masses of  
14 the candidate composing peptides as well as the fragment ions for identification of the  
15 composition of the peptides.

16

### 17 **Cross-link mapping and validation**

18 Validation and false discovery rate determination is facilitated by a software tool, called  
19 Yeun Yan (10). Only one candidate cross-linked peptide or cross-linked decoy peptide is  
20 assigned for each precursor ion, at least if the candidate fulfills certain criteria with respect  
21 to a minimum number of  $\gamma$  ions that should be assigned with a mass tolerance of 25-75 ppm  
22 to each of the composing peptides in a cross-linked peptide pair. Only assigned  $\gamma$  ions among  
23 the 100 fragments of highest signal intensity are taken into account. The number of required  
24 assigned  $\gamma$  ions differs for intra-protein and inter-protein cross-linked peptides, the latter

1 type of cross-links requiring more stringent criteria for assignment than the former type. This  
2 difference is based on the notion (10, 20-22) that that the probability of identifying cross-  
3 links as the result of a random event from a sequence database of many proteins is higher  
4 for cross-linked peptides from different protein sequences (inter-protein cross-links) than for  
5 cross-linked peptides comprising different peptide sequences from the same protein  
6 sequence (intra-protein cross-links). Intra-protein cross-links comprise peptides from the  
7 same protein sequence, whereas inter-protein cross-links comprise peptides from different  
8 protein sequences, unless the peptides have identical sequences, and, therefore, must have  
9 originated from two identical protein molecules in a complex, assuming that a given protein  
10 sequence does not yield two or more identical tryptic peptides. In the case of an intra-  
11 protein cross-link, at least one unambiguous y ion should be assigned for each composing  
12 peptide and both the number of assigned y ions for each composing peptide and the score,  
13 called the Yeun Yan score, defined below, should be the same as or more than the number  
14 of assigned y ions and the score for other possible candidates with forward sequences or  
15 one or more decoy sequences for the same precursor. No intra-protein cross-link decoy  
16 sequences consisting of reversed sequences from the same protein or hybrid forward and  
17 reversed sequences from the same protein were observed. For an inter-protein cross-linked  
18 peptide pair between different proteins or decoy cross-links, the number of assigned y ions  
19 should be at least 3 for each peptide built up from up to 10 amino acid residues and at least  
20 4 for peptides consisting of 11 amino acids or more. The number of assigned y ions for each  
21 peptide should be the same or more than the number of assigned y ions for each peptide of  
22 other possible candidates for the same precursor ion. Both the total number of y ions and  
23 the Yeun Yan score for a candidate cross-linked peptide should exceed the total number of y  
24 ions and the score for other possible candidates for the same precursor. These criteria are



1 also used for assignment of inter-protein cross-links comprising two identical sequences. For  
2 both intra- and inter-protein cross-links, a Yeun Yan score of more than 40 is required. We  
3 do not take into account the number of b ions as a requirement for assignment, since b ions  
4 in our dataset occur more than four times less than y ions, and taking them into account  
5 would require application of different statistical weights for assignment of b and y ions,  
6 which would complicate the calculations. Some spectra with a precursor mass difference of  
7 +1 Da compared with an identified cross-linked peptide were manually inspected to verify  
8 whether the precursor represents a cross-linked peptide in which the azide group was  
9 converted by TCEP to a hydroxyl group instead of an amine group (7). This appeared to be  
10 the case on a single occasion.

11 For proposed candidate cross-linked peptides, Yeun Yan calculates the masses of possible b  
12 and y fragments, b and y fragments resulting from water loss (b0, y0) and ammonia loss (b\*,  
13 y\*), fragment ions resulting from cleavage of the amide bonds of the cross-link, and b, b0,  
14 b\*, y, y0 and y\* fragments resulting from secondary fragmentations of cleavage products. A  
15 prerequisite for nomination by Yeun Yan as a candidate and calculation of the corresponding  
16 score is the presence in the MS2 spectrum of at least ten fragment ions and assignment of  
17 one unambiguous y ion per peptide. A y ion is considered ambiguous if it can also be  
18 assigned to one or more other fragments. A y ion resulting from primary and secondary  
19 cleavage at the same position is counted only once for the requirement with respect to the  
20 minimal number of unambiguous y ions for validation and assignment.

21 The YY score is calculated according to the equation

$$22 \text{ YY score} = (f_{\text{assigned}}/f_{\text{total}}) \times 100 \text{ (equation 3)}$$

23 in which  $f_{\text{assigned}}$  is the total number of matching fragment ions, including primary b and y  
24 fragments, b and y fragments resulting from water loss (b0, y0) and ammonia loss (b\*, y\*),

1 fragment ions resulting from cleavage of the amide bonds of the cross-link, and b, b<sub>0</sub>, b\*, y,  
2 y<sub>0</sub> and y\* fragments resulting from secondary fragmentation of products resulting from  
3 cross-link amide bond cleavages, and  $f_{\text{total}}$  is the total number of fragments ions in the  
4 spectrum with a maximum of 40, starting from the fragment ion of highest intensity.

5

## 6 **Cross-linking of isolated RNAP**

7 RNAP was purified from a pellet from 2L of culture of *B. subtilis* BS200 (*trpC2 spo0A3 rpoC-*  
8 *6his spc*) as follows. Following lysis in 20 mM KH<sub>2</sub>PO<sub>4</sub> pH8.0, 500 mM NaCl, 0.1mM DTT and  
9 clarification, RNAP was initially purified by Ni<sup>2+</sup> affinity chromatography. Pooled RNAP  
10 containing fractions were dialysed in 20 mM Tris-HCl pH7.8, 150 mM NaCl, 1 mM EDTA, 0.1  
11 mM DTT and loaded onto a MonoQ column(GE Healthcare) in dialysis buffer without EDTA.  
12 RNAP was eluted using a gradient over 10 column volumes in dialysis buffer supplemented  
13 with 2M NaCl. RNAP containing fractions were pooled and dialysed in 20 mM Tris-HCl pH7.8,  
14 150 mM NaCl, 10 mM MgCl<sub>2</sub>, 30% glycerol, 0.1 mM DTT prior to flash freezing and storage at  
15 -80°C. Before cross-linking RNAP was dialyzed in 20 mM HEPES, 150 mM NaCl, 10% glycerol,  
16 pH 7.4 (cross-linking buffer). RNAP was cross-linked at a protein concentration of 0.5 mg/ml  
17 for 30 min at room temperature. The cross-link reaction was started by the addition of a  
18 solution containing 80 mM BAMG in acetonitrile to obtain a final concentration of 0.4 mM  
19 BAMG and 0.5% acetonitrile. The reaction was quenched by adding 1 M Tris-HCl pH 8.0 to a  
20 final concentration of 50 mM. Digestion of the cross-linked protein and isolation and  
21 identification of cross-linked peptides was carried out as described previously (23).

22

## 23 **Determination of spatial distances between cross-linked residues**

24 PDB files of structural models were downloaded from the protein data bank

1 (<http://www.rcsb.org/pdb/home/home.do>). Only PDB files of *B. subtilis* proteins or proteins  
2 with at least 40% sequence identity were used. Sequences were aligned using the BLAST  
3 algorithm to identify corresponding residues.

4 (<http://blast.ncbi.nlm.nih.gov/Blast.cgi?PAGE=Proteins>). For RNAP, a homology model of *B.*  
5 *subtilis* elongation complex (24) (EC) was used. It gives similar results as with PDB file 2O5I  
6 (25). Structures were inspected with DeepView - Swiss-PdbViewer ([http://spdbv.vital-](http://spdbv.vital-it.ch/refs.html)  
7 [it.ch/refs.html](http://spdbv.vital-it.ch/refs.html)) for distance measurements.

8

## 9 **In silico docking**

10 A homology model of was used along with other published structures identified by their  
11 protein data bank IDs (PDB ID) detailed below. The N-terminal domain of  $\delta$  (PDB ID 2M4K)  
12 was used along with the EC model and *in vitro* and *in vivo* cross-linking data to produce a  
13 model using the HADDOCK2.2 web server Easy interface (26) 40 models in 10 clusters (4  
14 models per cluster) were obtained and analysed for compliance to the maximum C $\alpha$ -C $\alpha$   
15 cross-link distance permitted by BAMG (29.7Å) in PyMol v1.8.2.0. The total cumulative  
16 distance of  $\beta'$ K208- $\delta$ 48,  $\beta'$ K1104- $\delta$ 48, and  $\beta'$ K1152- $\delta$ 48 C $\alpha$  measurements was used to  
17 identify models that were most compliant (lowest cumulative distance) with cross-link  
18 criteria. To co-localise  $\delta$  and  $\sigma^A$  region 1.1, *E. coli* RNAP holoenzyme in which  $\sigma^{70}$  region 1.1  
19 was present (PDB ID 4LK1) (27) was super-imposed over the *B. subtilis* EC model and all but  
20  $\sigma^{70}$  region 1.1 deleted.

21

## 22 **RESULTS**

### 23 **Defined growth medium for in vivo cross-linking**

24 Addition of the cross-linker directly to a growth medium enables trapping of transient

1 protein interactions in living cells that may otherwise dissociate upon washing and medium  
2 exchange. This requires a low concentration of primary amines to minimize quenching of the  
3 cross-linker in the medium. We found that the growth rate of *B. subtilis* in minimal medium  
4 containing only 1.2 mM glutamine as the nitrogen source was almost identical to the growth  
5 rate using the standard 5 mM glutamine, with doubling times of 45 and 43 min, respectively  
6 (Figure 1a). Addition of 2 mM of the cross-linker BAMG resulted in an immediate end to the  
7 increase in OD<sub>600 nm</sub>, indicating that biomass production ceased instantaneously (Figure 2,  
8 Supporting Information). As shown by SDS-PAGE analysis (Figure 1b), most extracted  
9 proteins become cross-linked upon treatment of the cells with 2 mM BAMG for 5 min. The  
10 same results were obtained with disuccinimidyl glutarate (DSG) (Figure 1b). This indicates  
11 that the azidomethylene group in BAMG does not affect membrane permeability, with DSG  
12 and BAMG having about the same protein cross-linking efficiency (7). SDS-PAGE analysis  
13 (Figure 3, Supporting Information) shows that the cross-linked proteins could be digested  
14 efficiently, establishing a set of experimental conditions suitable for the identification of *in*  
15 *vivo* cross-linked peptides.

16

### 17 **In vivo cross-linking of Gram-negative species**

18 It is well known that the outer membrane of Gram negative bacteria forms a barrier for the  
19 diffusion of lipophilic compounds, due to the relatively low fluidity of the bilayer imposed by  
20 the lipopolysaccharide outer leaflet (28). To test whether this property prevents the use of  
21 BAMG as an effective cross-linker for soluble proteins in Gram negative species, we used  
22 *Escherichia coli* as an example. Cells were grown in a MOPS medium with 0.16% N-  
23 acetylglucosamine as the only source for energy, carbon and nitrogen. The culture medium  
24 was also supplied with 0.1 mM NH<sub>4</sub>Cl to provide the cells with a small amount of a nitrogen

1 source to enable a rapid start of growth. When the  $\text{NH}_4^+$  in the medium has been consumed,  
2 cells have to rely on the ammonia that is formed intracellularly during catabolism of N-  
3 acetylglucosamine. Based on published data (13) it can be calculated that the amount of  
4  $\text{NH}_4^+$  thus formed will be enough for fast growth, and will not accumulate to concentrations  
5 that will decrease the concentration of BAMG by more than 1 mM by reaction with the  
6 cross-linker (Experimental procedures). The doubling time under these conditions is 56 min  
7 during mid exponential growth. This compares favorably with a similar, but slightly faster,  
8 doubling time of 50-55 min reported by others using a medium containing N-  
9 acetylglucosamine supplemented with 9.5 mM  $\text{NH}_4\text{Cl}$  as a nitrogen source (16). Upon  
10 addition of 2 mM BAMG to the exponentially growing cells in this medium, inhibition of  
11 growth occurred (Figure 4, Supporting Information). However, in striking contrast with the  
12 *Bacillus subtilis* results (Figure 1b), SDS-PAGE analysis provided no evidence for large scale  
13 cross-linking of extracted proteins from BAMG-treated *E. coli* cells, since the Coomassie-  
14 blue-stained patterns in the lanes from control cells and cross-linked cells were  
15 indistinguishable (Figure 5, Supporting Information). These results are in agreement with the  
16 known slow diffusion rate of hydrophobic compounds through the outer membrane and put  
17 limitations on the use of Gram-negative organisms for rapid *in vivo* cross-linking by N-  
18 hydroxysuccinimidyl esters.

19

## 20 **Mass spectrometric analysis reveals a large number of cross-linked peptides at a low false** 21 **discovery rate**

22 The work-flow for sample preparation of cross-linked peptides from *in vivo* cross-linked *B.*  
23 *subtilis* cells for LC-MS/MS analysis is shown in Figure 2b. After cross-linking and protein  
24 extraction, cross-linked proteins were fractionated by size exclusion chromatography to

1 obtain a sample expected to be enriched in cross-links formed during transient interaction.  
2 To this end samples with a size distribution of roughly 400 to 2000 kDa were used for further  
3 analysis. This fraction was enriched in RNAP and also contained ribosomes, i.e., protein  
4 complexes involved in processes guided by many transient protein-protein interactions. A  
5 list of proteins present in this fraction, identified by peptide fragment fingerprinting, and  
6 sorted according to their abundance index (29), is presented in Table 1 (Supporting  
7 Information). Besides subunits from ribosomes and RNAP, we also detected many proteins  
8 of high abundance with a known molecular weight far below 400 kDa, that included all  
9 glycolytic and TCA cycle enzymes, and many enzymes involved in amino acid synthesis,  
10 indicating that these proteins interact *in vivo* with other proteins.

11 After trypsin digestion of the extracted proteins in the high molecular weight  
12 fraction, cross-linked peptides were enriched by diagonal strong cation exchange (SCX)  
13 chromatography (9). The principle of the enrichment is schematically depicted in Figure 2b.  
14 Peptides in the cross-link-enriched SCX fractions were subjected to LC-MS/MS, data  
15 processing and database searching, according to the workflow schematically depicted in  
16 Figure 3 (10). For efficient identification of cross-linked peptides from the entire *B. subtilis*  
17 sequence database with MS/MS data, it is necessary to know the masses of the two peptides  
18 in a cross-link. This is possible due to abundant signals in MS/MS spectra arising from  
19 cleavage of the two cross-linked amide bonds (10) shown as an example in the mass  
20 spectrum in Figure 4. Following this protocol, we identified 82 unique inter-protein cross-  
21 links (Table 2, Supporting Information) and 369 unique intra-protein cross-links (Table 3,  
22 Supporting Information) in 299 and 1920 precursor ions, respectively, that fulfilled all criteria  
23 mentioned in Figure 3. Importantly, no decoy peptides fulfilled these criteria, indicating a  
24 very low false discovery rate (FDR).

1           About 39% of the 82 unique inter-protein cross-linked peptides are from enzymes  
2 involved in intermediary metabolism, protein and RNA folding, and protein and RNA  
3 degradation. Most of these cross-links comprise peptides with identical sequences, showing  
4 that the parent proteins occurred in symmetric homodimers, possibly organized in higher  
5 order assemblies. About 40% of all inter-protein cross-links are from translation complexes,  
6 i.e., ribosomes and auxiliary proteins involved in translation, and about 18% are from  
7 transcription complexes, i.e., RNAP and initiation and elongation factors (Table 2, Supporting  
8 Information).

9

#### 10 **Use of different assignment criteria for inter-protein and intra-protein cross-linked** 11 **peptides**

12 To obtain a low FDR of both intra-protein and inter-protein cross-links we used different  
13 assignment criteria for these two types of cross-links (Figure 3). Since the probability of  
14 identifying false positive cross-linked peptide pairs from a complete sequence database is  
15 much higher for inter-protein cross-links than for intra-protein cross-links, false discoveries  
16 are practically all confined to inter-protein cross-links if the same assignment criteria are  
17 employed for both cross-link type (10, 21, 22). In Table 4 (Supporting Information) it is  
18 shown how variations in assignment criteria affect the number of identified cross-links and  
19 the FDR. Applying the more stringent criteria for assignment of inter-protein cross-links to  
20 intra-protein cross-links only leads to a decrease of approximately 20% assigned unique  
21 cross-linked peptides. Consequently, the number of assigned inter-protein cross-links slightly  
22 increases upon relaxing the stringency of the criteria for assignment. However, this increase  
23 is accompanied by a relatively large increase in FDR. So, the stringent criteria that we apply  
24 here for inter-protein cross-links result in efficient identification and an extremely low FDR.

1

## 2 **Biological consistency of identified cross-linked peptides**

3 To corroborate identified cross-linked peptides by comparison with published data we  
4 determined spatial distances between C $\alpha$  atoms of linked residues. In models of crystal  
5 structures, the maximal distance that can be spanned by BAMG varies between 25.7 to 29.7  
6 Å, assuming a spacer length of BAMG of 7.7 Å, a lysine side chain length of 6.5 Å and a  
7 coordinate error of 2.5 – 4.5 Å. The distances between 95.6% (n = 135) of C $\alpha$  atom pairs of  
8 linked residues in cross-links with non-overlapping sequences from one protein (denoted  
9 intra-protein cross-links) are less than 25.7 Å, including 14 inter-protein cross-links between  
10 identical proteins that fitted better than intra-protein species (Table 3 and Figure 6 of the  
11 Supporting Information). The distances between C $\alpha$  atoms of linked residues of only 2 cross-  
12 links out of the 135 exceed 29.7 Å. These results underscore the high biological consistency  
13 and, thereby, reliability of identified cross-linked peptides.

14 Table 1 lists the inter-protein cross-linked peptides from transcription and translation  
15 complexes. The distances between the C $\alpha$  atoms of interlinked lysine residues of all 9 cross-  
16 links comprising peptides from proteins involved in transcription are in agreement with  
17 models based on crystal structures. Also 5 small ribosomal inter-protein cross-linked  
18 peptides nicely fit in the available structural model of a stalled ribosome (30). However, five  
19 small ribosomal inter-protein cross-links that exceed 29.7 Å by more than 45 Å were notable  
20 exceptions. Since the FDR is extremely low and the large majority of our dataset is  
21 biologically consistent, it is reasonable to assume that formation of these cross-links actually  
22 took place. Most likely these distance measurements represent the detection of ribosomal  
23 assembly intermediates and/or covalent links between juxtaposed ribosomes.

24



## 1 **Many cross-links reveal transient protein-protein interactions**

2 The power of our approach was demonstrated by the detection of several transient  
3 interactions between translation factors and ribosomes and between transcription factors  
4 and core RNAP (Table 1). Ribosome-recycling factor RRF forms a cross-link with ribosomal  
5 protein RL11, in agreement with cryo-EM data showing an interaction between these two  
6 proteins in the post-termination complex (31). A cross-link between RL19 and EF-Tu is in  
7 agreement with the presence of RL19 near the EF-Tu binding site on the ribosome (32).  
8 Cross-linked peptides were found between K4 and K55 of the transcription elongation factor  
9 GreA and residues  $\beta$ -K156 and  $\beta'$ -K830, respectively, in the RNAP secondary channel. This  
10 position fits with the known function of GreA and with a crystal structure of a chimeric Gfh1-  
11 GreA in complex with RNAP (33). Likewise, the binding of NusA close to the RNA exit channel  
12 of RNAP, as revealed by a cross-link between NusA-K111 and  $\beta$ -K849, is in agreement with  
13 results obtained previously that indicates the N-terminal domain of NusA binds to the  $\beta$ -flap  
14 tip of RNAP (24, 34). Two cross-linked peptides between the sigma A factor ( $\sigma^A$ ) and RNAP  
15 were identified. The distances between C $\alpha$  atoms of corresponding residues in the structure  
16 of the *E. coli* RNAP holoenzyme (35) are 16.1 Å and 11.6 Å. Thus, the spatial arrangements of  
17 the proteins involved in these transient interactions, are in agreement with previously  
18 published *in vitro* data, underscoring the reliability of our *in vivo* cross-link approach.

19 Of great interest was the identification of novel transient interactions. A binding site  
20 of the RNA chaperone CspB on ribosomes, as revealed by a cross-link between CspB and RS2,  
21 has not been observed before to our knowledge. This interaction makes sense, since cold  
22 shock proteins co-localise with ribosomes in live cells and are involved in coupling  
23 transcription and translation (36, 37). The biological significance of the interaction between  
24 glutamate dehydrogenase GudB and transcription elongation factor NusA is not known, but

1 recent work may suggest a functional link between the two proteins. The *gudB* gene  
2 encodes a cryptic glutamate dehydrogenase (GDH), which is highly expressed but not active.  
3 If the main GDH (RocG) is inactivated, a frame-shift mutation activates GudB. This mutation  
4 depends on transcription of *gudB*, and requires the transcription-repair coupling factor Mfd  
5 (38). Interestingly, NusA is also involved in transcription-coupled repair (39). Whether the  
6 interaction of GudB with NusA is relevant for the regulation of this gene decryption remains  
7 to be established.

8 Another noteworthy interaction is revealed by a cross-link between the  $\beta'$  subunit of  
9 RNAP and a protein originally found associated with isolated RNAP named  $\delta$  (40).  
10 Importantly,  $\delta$  has a complex effect on transcription. It inhibits initiation from weak  
11 promoters mediated by  $\sigma^A$  (41, 42), stimulates or inhibits transcription from certain other  
12 promoters (43, 44) and increases RNAP recycling speed (42, 43) in synergy with the DNA  
13 helicase Held (45), probably by dissociation of stalled RNAP-DNA or RNAP-RNA complexes.  
14 Transcriptomics experiments indicate  $\delta$  reduces non-specific initiation of transcription which  
15 is relatively prevalent in Gram positive bacteria (46, 47). Up to now it has remained elusive  
16 how these different effects on transcription are brought about.

17 The 20.4 kDa  $\delta$  occurs exclusively in Gram-positive bacteria. It consists of an amino-  
18 terminal globular domain and a nucleic acid-mimicking highly acidic unstructured C-terminal  
19 half (48, 49). The  $\delta$  protein forms a complex with the RNAP core enzyme in a 1:1  
20 stoichiometry (43, 48, 50). A truncated form of  $\delta$  lacking the C-terminal half is sufficient for  
21 binding to RNAP. Intact  $\delta$ , as well as the acidic unstructured C-terminal domain, but not the  
22 truncated N-terminal domain inhibits the binding of nucleic acids to RNAP. It has been  
23 proposed that the amino-terminal RNAP-binding domain may act both to orient and increase  
24 the local concentration of the flexible negatively charged carboxyl terminal domain to

1 effectively shield nearby positively charged nucleic acid binding sites on RNAP (48). The  
2 effect of  $\delta$  on promoter selectivity by  $\sigma^A$ -mediated initiation suggests an interaction of  $\delta$   
3 with the preinitiation complex. Indeed, it has been reported that  $\delta$  and  $\sigma^A$  can bind  
4 simultaneously to core RNAP, with negative cooperativity (51). However, other experiments  
5 indicated mutual exclusion of the binding of  $\delta$  and  $\sigma^A$  to core RNAP (43, 52).

6 We identified a cross-link between K48 of the  $\delta$  subunit (RpoE) and K1104 of the  
7 RNAP  $\beta'$  subunit (RpoC) (Figure 4). K1104 is located in the so-called downstream clamp  
8 region. This suggests a binding site for the  $\delta$  subunit on RNAP close to the downstream DNA  
9 binding cleft. To confirm this finding, we performed *in vitro* cross-linking with purified  $\delta$ -  
10 containing RNAP. This resulted in two additional cross-links, one between K48 of  $\delta$  and  
11 residue  $\beta'$ -K208, and one between  $\delta$ -K48 and  $\beta'$ -K1152, both in close proximity to  $\beta'$ -K1104,  
12 thereby corroborating our *in vivo* findings. Since only one residue in the N-terminal domain  
13 of  $\delta$  was involved in cross-linking, further evidence is required to assign a preferential  
14 orientation of delta with respect to the clamp region. To this end we used in an *in silico*  
15 docking analysis using a *B. subtilis* RNAP elongation complex model and the known N-  
16 terminal domain structure of  $\delta$  (24, 53). The best 10 output models were analyzed to  
17 establish which complied with the maximum C $\alpha$ -C $\alpha$  cross-link distance achievable with  
18 BAMG (Table 5, Supporting Information). In all but one model, at least one cross-link  
19 exceeded the 29.7 Å maximum distance, however, in published structures of RNAP,  
20 crystallographic B factors are relatively high around positions  $\beta'$ -K1104 and  $\beta'$ -K1152,  
21 implying some conformational flexibility in those regions. The model which gave the lowest  
22 cumulative C $\alpha$ -C $\alpha$  cross-link distance, with all predicted cross-links < 29.7 Å places  $\delta$  in the  
23 downstream side of the DNA binding cleft of RNAP (Figure 5a). A position of  $\delta$  inside the DNA  
24 binding cleft as shown in Figure 5b suggests that the N-terminal domain of  $\delta$  could sterically

1 inhibit the binding of downstream DNA. In this position  $\delta$  could also sterically inhibit the  
2 binding of the 1.1 region of  $\sigma^A$ , since this region is expected to interact with an overlapping  
3 binding site, based on crystal structures of *E. coli* RNAP holoenzyme with the homologous  $\sigma^{70}$   
4 factor (27, 35). The model with the next lowest aggregate score also placed  $\delta$  in this region,  
5 but the remaining 8 placed it on top of the  $\beta'$  subunit outside of the DNA binding cleft  
6 (Figure 5c). This position of the N-terminal domain of  $\delta$  outside the downstream DNA  
7 channel but close to its entrance implies that interference with DNA binding and binding of  
8 the 1.1 region of the  $\sigma$  factor requires penetration of the C-terminal unstructured acid  
9 domain into the channel to interact with positive charges of the polymerase involved in DNA  
10 binding and in binding of the  $\sigma$  1.1 region. Since  $\delta$  is known to displace RNA more efficiently  
11 than it can DNA (48) and is important in RNAP recycling following the termination of  
12 transcription (45), we expect that it must be oriented so that the acidic C-terminal domain is  
13 able to influence RNA binding through contact with the transcript close to or even within the  
14 RNA exit channel. However, the data prevent discrimination between models placing  $\delta$   
15 inside or outside the downstream DNA channel, since both the aggregate distance scores  
16 (Table 5, Supporting Information) and the HADDOCK scores of the best models show only  
17 small differences.

18

## 19 **DISCUSSION**

20 We have developed a new method for proteome-wide identification of cross-links  
21 introduced *in vivo* by N-hydroxysuccinimidyl esters directly in a bacterial cell culture. Within  
22 as little as 5 min extensive cross-linking was observed, using 2 mM BAMG. This implies that  
23 cross-link analysis on a time scale of seconds could be a future development, enabling, for  
24 instance, monitoring at the peptide level transient protein-protein interactions involved in

1 rapid cellular adaptation. Rapid *in vivo* cross-linking requires a Gram-positive organism, since  
2 the outer membrane of Gram-negative species forms a barrier for diffusion.

3         With our method we identified many inter-protein cross-links confirming several  
4 known stable and transient protein interactions, underscoring the reliability of the approach.  
5 In addition, we found intriguing new interactions that deserve further investigation to  
6 understand their functional significance, like the interaction between GudB and NusA.  
7 Another intriguing cross-link was found between the  $\delta$  and  $\beta'$  subunits of RNAP. This cross-  
8 link revealed that  $\delta$  binds to the clamp region of RNAP close to the entrance of the  
9 downstream DNA binding cleft. However, the cross-link data combined with *in silico* docking  
10 experiments did not provide enough evidence to assign an unambiguous orientation of  $\delta$   
11 with respect to the channel. This implies that different scenarios are possible for the  
12 molecular mechanism by which  $\delta$  regulates promoter selectivity and promotes RNAP  
13 recycling. However, the knowledge that  $\delta$  binds to the clamp region of  $\beta'$  will help to design  
14 experiments aimed at developing a better understanding of the mechanism of action of  $\delta$ .

15         Besides membrane permeability, the unique chemical properties of BAMG, combined  
16 with our statistical analysis, are at the heart of the large number of identified cross-linked  
17 peptides with high biological consistency and low false discovery rate. This is also the first  
18 study in which a large number of cross-links from intracellular protein complexes generated  
19 in undisturbed growing cells have been identified by mass spectrometry and database  
20 searching using a complete species specific database. Our dataset consists of about 18%  
21 inter-protein and 82% intra-protein cross-links. This percentage of inter-protein cross-links is  
22 relatively low in comparison with other datasets obtained either by *in vivo* cross-linking of  
23 bacteria (2-5) or by cross-linking bacterial cellular protein extracts of high complexity (54,  
24 55). Also, the reported fractions of inter-protein cross-links identified in human cells, 23-25%

1 of the total number of cross-links (56, 57), is relatively high compared with the 10% that we  
2 obtained in a previous study (10). We consider it important for the future development of  
3 the technology to understand the causes of such differences. In one of these studies (57) we  
4 noticed that many sequences of the peptides from identified cross-links, classified as  
5 intermolecular species, are not unique, and therefore that many cross-linked peptide pairs  
6 could either be from the same protein or from different proteins. Furthermore, in protein  
7 extracts non-specific interactions may be formed dependent on extraction conditions.  
8 However, a key difference between these reports (2-5, 54-57) and our approach concerns  
9 the statistical analysis, in which we make a distinction between inter- and intra-molecular  
10 cross-links. If this distinction is not made, an overestimation of intermolecular cross-links  
11 occurs at the expense of a relatively large number of false positives.

12 In this study we provide an efficient layout for proteome scale crosslink identification  
13 using in-culture crosslinking. Several modifications to the method can be made to tailor  
14 specific experimental requirements. For example, in proteome-wide analyses low abundance  
15 cross-links can escape detection by LC-MS/MS. The use of affinity tagged target proteins will  
16 enable enrichment of these complexes for subsequent inter-peptide cross-link identification  
17 of transient interactions. Furthermore, in this study we have focused on the soluble fraction  
18 of cross-linked cells. Further extraction and digestion of the insoluble fraction, enriched in  
19 membrane and cell wall proteins, is likely to reveal a rich source of interesting protein  
20 crosslinks. Relative quantification of cross-linked peptides can also be employed with  
21 commercially available isotope-labeled starting materials for the synthesis route of BAMG  
22 presented here. Finally, our analytical strategy may also benefit from the option of mass  
23 spectrometry to combine collision-induced dissociation with electron transfer dissociation  
24 (57, 58) to increase efficiency of identification of cross-linked peptides. The high average

1 precursor charge state of slightly more than +4 of all identified BAMG-cross-linked peptides  
2 in our dataset is favorable for the latter fragmentation method (59). Overall, we believe that  
3 the *in vivo* cross-linking and data analysis methods developed here will pave the way to a  
4 systems level view on dynamic protein interactions. Such a view will lead to a deeper  
5 understanding of the molecular mechanisms of biological processes guided by dynamic  
6 protein-protein interactions in the cell.

7

## 8 **CONCLUSIONS**

9 A system has been developed for rapid *in vivo* protein cross-linking by an amine-specific  
10 bifunctional reagent added directly to a culture of *Bacillus subtilis*. We identified several  
11 stable and dynamic interactions in intracellular protein complexes with a size range of about  
12 400 to 2000 kDa by mass spectrometric analysis of isolated cross-linked peptides and  
13 database searching using the entire species specific sequence database. In culture cross-  
14 linking of cytoplasmic protein in Gram-positive bacteria is much faster than in Gram-negative  
15 species. In combination with affinity purification of target proteins, our *in vivo* cross-link  
16 technology will be useful to obtain insight in the molecular mechanisms of processes guided  
17 by dynamic protein-protein interactions in large assemblies.

18

## 19 **ACKNOWLEDGEMENTS**

20 Work in P.J.L's laboratory was supported by a grant from the Australian Research Council  
21 (ARC, DP110100190)

22

## 23 **SUPPORTING INFORMATION**

24 PDF files: Figures S1-S6; Table S4-S5

1 Excel files: Table S1-S3

2

### 3 **ADDITIONAL INFORMATION**

4 The programs REANG and YEUN YAN, written in Visual Basics for Applications will be send on

5 request by the authors W.R: [w.roseboom@uva.nl](mailto:w.roseboom@uva.nl) or H.B: [h.buncherd@gmail.com](mailto:h.buncherd@gmail.com)

6

7

### 8 **REFERENCES**

9

- 10 1. Leitner, A.; Faini, M.; Stengel, F.; Aebersold, R., Crosslinking and Mass Spectrometry: An  
11 Integrated Technology to Understand the Structure and Function of Molecular Machines. *Trends*  
12 *Biochem Sci* **2016**, *41*, 20-32.
- 13 2. Navare, A. T.; Chavez, J. D.; Zheng, C.; Weisbrod, C. R.; Eng, J. K.; Siehnel, R.; Singh, P. K.;  
14 Manoil, C.; Bruce, J. E., Probing the protein interaction network of *Pseudomonas aeruginosa* cells by  
15 chemical cross-linking mass spectrometry. *Structure* **2015**, *23*, 762-73.
- 16 3. Wu, X.; Chavez, J. D.; Schweppe, D. K.; Zheng, C.; Weisbrod, C. R.; Eng, J. K.; Murali, A.; Lee, S.  
17 A.; Ramage, E.; Gallagher, L. A.; Kulasekara, H. D.; Edrozo, M. E.; Kamischke, C. N.; Brittnacher, M. J.;  
18 Miller, S. I.; Singh, P. K.; Manoil, C.; Bruce, J. E., In vivo protein interaction network analysis reveals  
19 porin-localized antibiotic inactivation in *Acinetobacter baumannii* strain AB5075. *Nat Commun* **2016**,  
20 *7*, 13414.
- 21 4. Zhang, H.; Tang, X.; Munske, G. R.; Zakharova, N.; Yang, L.; Zheng, C.; Wolff, M. A.; Tolic, N.;  
22 Anderson, G. A.; Shi, L.; Marshall, M. J.; Fredrickson, J. K.; Bruce, J. E., In vivo identification of the  
23 outer membrane protein OmcA-MtrC interaction network in *Shewanella oneidensis* MR-1 cells using  
24 novel hydrophobic chemical cross-linkers. *J Proteome Res* **2008**, *7*, 1712-20.
- 25 5. Zheng, C.; Yang, L.; Hoopmann, M. R.; Eng, J. K.; Tang, X.; Weisbrod, C. R.; Bruce, J. E., Cross-  
26 linking measurements of in vivo protein complex topologies. *Mol Cell Proteomics* **2011**, *10*, M110  
27 006841.
- 28 6. Graumann, P., *Bacillus: Cellular and Molecular Biology*. Second ed.; Caister Academic Press:  
29 Norfolk, United Kingdom, 2012.
- 30 7. Kasper, P. T.; Back, J. W.; Vitale, M.; Hartog, A. F.; Roseboom, W.; de Koning, L. J.; van  
31 Maarseveen, J. H.; Muijsers, A. O.; de Koster, C. G.; de Jong, L., An aptly positioned azido group in the  
32 spacer of a protein cross-linker for facile mapping of lysines in close proximity. *Chembiochem* **2007**, *8*,  
33 1281-92.
- 34 8. Nowak, D. E.; Tian, B.; Brasier, A. R., Two-step cross-linking method for identification of NF-  
35 kappaB gene network by chromatin immunoprecipitation. *Biotechniques* **2005**, *39*, 715-25.
- 36 9. Buncherd, H.; Roseboom, W.; Ghavim, B.; Du, W.; de Koning, L. J.; de Koster, C. G.; de Jong,  
37 L., Isolation of cross-linked peptides by diagonal strong cation exchange chromatography for protein  
38 complex topology studies by peptide fragment fingerprinting from large sequence databases. *J*  
39 *Chromatogr A* **2014**, *1348*, 34-46.
- 40 10. Buncherd, H.; Roseboom, W.; de Koning, L. J.; de Koster, C. G.; de Jong, L., A gas phase  
41 cleavage reaction of cross-linked peptides for protein complex topology studies by peptide fragment  
42 fingerprinting from large sequence database. *J Proteomics* **2014**, *108*, 65-77.



- 1 11. Kaake, R. M.; Wang, X.; Burke, A.; Yu, C.; Kandur, W.; Yang, Y.; Novtisky, E. J.; Second, T.;  
2 Duan, J.; Kao, A.; Guan, S.; Vellucci, D.; Rychnovsky, S. D.; Huang, L., A new in vivo cross-linking mass  
3 spectrometry platform to define protein-protein interactions in living cells. *Mol Cell Proteomics* **2014**,  
4 *13*, 3533-43.
- 5 12. Leonard, N. M.; Brunckova, J., In situ formation of N-trifluoroacetoxy succinimide (TFA-NHS):  
6 one-pot formation of succinimidyl esters, N-trifluoroacetyl amino acid succinimidyl esters, and N-  
7 maleoyl amino acid succinimidyl esters. *J Org Chem* **2011**, *76*, 9169-74.
- 8 13. Neidhardt, F. C.; Bloch, P. L.; Smith, D. F., Culture medium for enterobacteria. *J Bacteriol*  
9 **1974**, *119*, 736-47.
- 10 14. Hu, P.; Leighton, T.; Ishkhanova, G.; Kustu, S., Sensing of nitrogen limitation by *Bacillus*  
11 *subtilis*: comparison to enteric bacteria. *J Bacteriol* **1999**, *181*, 5042-50.
- 12 15. Soini, J.; Ukkonen, K.; Neubauer, P., High cell density media for *Escherichia coli* are generally  
13 designed for aerobic cultivations - consequences for large-scale bioprocesses and shake flask  
14 cultures. *Microb Cell Fact* **2008**, *7*, 26.
- 15 16. Alvarez-Anorve, L. I.; Calcagno, M. L.; Plumbridge, J., Why does *Escherichia coli* grow more  
16 slowly on glucosamine than on N-acetylglucosamine? Effects of enzyme levels and allosteric  
17 activation of GlcN6P deaminase (NagB) on growth rates. *J Bacteriol* **2005**, *187*, 2974-82.
- 18 17. Laemmli, U. K., Cleavage of structural proteins during the assembly of the head of  
19 bacteriophage T4. *Nature* **1970**, *227*, 680-5.
- 20 18. Smith, P. K.; Krohn, R. I.; Hermanson, G. T.; Mallia, A. K.; Gartner, F. H.; Provenzano, M. D.;  
21 Fujimoto, E. K.; Goeke, N. M.; Olson, B. J.; Klenk, D. C., Measurement of protein using bicinchoninic  
22 acid. *Anal Biochem* **1985**, *150*, 76-85.
- 23 19. Zheng, L.; Abhyankar, W.; Ouwering, N.; Dekker, H. L.; van Veen, H.; van der Wel, N. N.;  
24 Roseboom, W.; de Koning, L. J.; Brul, S.; de Koster, C. G., *Bacillus subtilis* Spore Inner Membrane  
25 Proteome. *J Proteome Res* **2016**, *15*, 585-94.
- 26 20. Rinner, O.; Seebacher, J.; Walzthoeni, T.; Mueller, L.; Beck, M.; Schmidt, A.; Mueller, M.;  
27 Aebersold, R., Identification of cross-linked peptides from large sequence databases. *Nat Methods*  
28 **2008**, *5*, 315-8.
- 29 21. Trnka, M. J.; Baker, P. R.; Robinson, P. J.; Burlingame, A. L.; Chalkley, R. J., Matching cross-  
30 linked peptide spectra: only as good as the worse identification. *Mol Cell Proteomics* **2014**, *13*, 420-  
31 34.
- 32 22. Walzthoeni, T.; Claassen, M.; Leitner, A.; Herzog, F.; Bohn, S.; Forster, F.; Beck, M.; Aebersold,  
33 R., False discovery rate estimation for cross-linked peptides identified by mass spectrometry. *Nat*  
34 *Methods* **2012**, *9*, 901-3.
- 35 23. Glas, M.; van den Berg van Saparoea, H. B.; McLaughlin, S. H.; Roseboom, W.; Liu, F.;  
36 Koningstein, G. M.; Fish, A.; den Blaauwen, T.; Heck, A. J.; de Jong, L.; Bitter, W.; de Esch, I. J.; Luirink,  
37 J., The Soluble Periplasmic Domains of *Escherichia coli* Cell Division Proteins FtsQ/FtsB/FtsL Form a  
38 Trimeric Complex with Submicromolar Affinity. *J Biol Chem* **2015**, *290*, 21498-509.
- 39 24. Ma, C.; Mobli, M.; Yang, X.; Keller, A. N.; King, G. F.; Lewis, P. J., RNA polymerase-induced  
40 remodelling of NusA produces a pause enhancement complex. *Nucleic Acids Res* **2015**, *43*, 2829-40.
- 41 25. Vassilyev, D. G.; Vassilyeva, M. N.; Perederina, A.; Tahirov, T. H.; Artsimovitch, I., Structural  
42 basis for transcription elongation by bacterial RNA polymerase. *Nature* **2007**, *448*, 157-62.
- 43 26. van Zundert, G. C.; Rodrigues, J. P.; Trellet, M.; Schmitz, C.; Kastiris, P. L.; Karaca, E.;  
44 Melquiond, A. S.; van Dijk, M.; de Vries, S. J.; Bonvin, A. M., The HADDOCK2.2 Web Server: User-  
45 Friendly Integrative Modeling of Biomolecular Complexes. *J Mol Biol* **2016**, *428*, 720-5.
- 46 27. Bae, B.; Davis, E.; Brown, D.; Campbell, E. A.; Wigneshweraraj, S.; Darst, S. A., Phage T7 Gp2  
47 inhibition of *Escherichia coli* RNA polymerase involves misappropriation of sigma70 domain 1.1. *Proc*  
48 *Natl Acad Sci U S A* **2013**, *110*, 19772-7.
- 49 28. Nikaido, H., Molecular basis of bacterial outer membrane permeability revisited. *Microbiol*  
50 *Mol Biol Rev* **2003**, *67*, 593-656.

- 1 29. Ishihama, Y.; Oda, Y.; Tabata, T.; Sato, T.; Nagasu, T.; Rappsilber, J.; Mann, M., Exponentially  
2 modified protein abundance index (emPAI) for estimation of absolute protein amount in proteomics  
3 by the number of sequenced peptides per protein. *Mol Cell Proteomics* **2005**, *4*, 1265-72.
- 4 30. Sohmen, D.; Chiba, S.; Shimokawa-Chiba, N.; Innis, C. A.; Berninghausen, O.; Beckmann, R.;  
5 Ito, K.; Wilson, D. N., Structure of the Bacillus subtilis 70S ribosome reveals the basis for species-  
6 specific stalling. *Nat Commun* **2015**, *6*, 6941.
- 7 31. Yokoyama, T.; Shaikh, T. R.; Iwakura, N.; Kaji, H.; Kaji, A.; Agrawal, R. K., Structural insights  
8 into initial and intermediate steps of the ribosome-recycling process. *EMBO J* **2012**, *31*, 1836-46.
- 9 32. Fagan, C. E.; Dunkle, J. A.; Maehigashi, T.; Dang, M. N.; Devaraj, A.; Miles, S. J.; Qin, D.;  
10 Fredrick, K.; Dunham, C. M., Reorganization of an intersubunit bridge induced by disparate 16S  
11 ribosomal ambiguity mutations mimics an EF-Tu-bound state. *Proc Natl Acad Sci U S A* **2013**, *110*,  
12 9716-21.
- 13 33. Sekine, S.; Murayama, Y.; Svetlov, V.; Nudler, E.; Yokoyama, S., The ratcheted and ratchetable  
14 structural states of RNA polymerase underlie multiple transcriptional functions. *Mol Cell* **2015**, *57*,  
15 408-21.
- 16 34. Ha, K. S.; Touloukianov, I.; Vassilyev, D. G.; Landick, R., The NusA N-terminal domain is  
17 necessary and sufficient for enhancement of transcriptional pausing via interaction with the RNA exit  
18 channel of RNA polymerase. *J Mol Biol* **2010**, *401*, 708-25.
- 19 35. Murakami, K. S., X-ray crystal structure of Escherichia coli RNA polymerase sigma70  
20 holoenzyme. *J Biol Chem* **2013**, *288*, 9126-34.
- 21 36. El-Sharoud, W. M.; Graumann, P. L., Cold shock proteins aid coupling of transcription and  
22 translation in bacteria. *Sci Prog* **2007**, *90*, (Pt 1), 15-27.
- 23 37. Weber, M. H.; Volkov, A. V.; Fricke, I.; Marahiel, M. A.; Graumann, P. L., Localization of cold  
24 shock proteins to cytosolic spaces surrounding nucleoids in Bacillus subtilis depends on active  
25 transcription. *J Bacteriol* **2001**, *183*, 6435-43.
- 26 38. Gunka, K.; Tholen, S.; Gerwig, J.; Herzberg, C.; Stulke, J.; Commichau, F. M., A high-frequency  
27 mutation in Bacillus subtilis: requirements for the decryptification of the gudB glutamate  
28 dehydrogenase gene. *J Bacteriol* **2012**, *194*, 1036-44.
- 29 39. Cohen, S. E.; Lewis, C. A.; Mooney, R. A.; Kohanski, M. A.; Collins, J. J.; Landick, R.; Walker, G.  
30 C., Roles for the transcription elongation factor NusA in both DNA repair and damage tolerance  
31 pathways in Escherichia coli. *Proc Natl Acad Sci U S A* **2010**, *107*, 15517-22.
- 32 40. Pero, J.; Nelson, J.; Fox, T. D., Highly asymmetric transcription by RNA polymerase containing  
33 phage-SP01-induced polypeptides and a new host protein. *Proc Natl Acad Sci U S A* **1975**, *72*, 1589-  
34 93.
- 35 41. Dobinson, K. F.; Spiegelman, G. B., Effect of the delta subunit of Bacillus subtilis RNA  
36 polymerase on initiation of RNA synthesis at two bacteriophage phi 29 promoters. *Biochemistry*  
37 **1987**, *26*, 8206-13.
- 38 42. Juang, Y. L.; Helmann, J. D., The delta subunit of Bacillus subtilis RNA polymerase. An  
39 allosteric effector of the initiation and core-recycling phases of transcription. *J Mol Biol* **1994**, *239*, 1-  
40 14.
- 41 43. Prajapati, R. K.; Sengupta, S.; Rudra, P.; Mukhopadhyay, J., Bacillus subtilis delta Factor  
42 Functions as a Transcriptional Regulator by Facilitating the Open Complex Formation. *J Biol Chem*  
43 **2016**, *291*, 1064-75.
- 44 44. Prajapati, R. K.; Sur, R.; Mukhopadhyay, J., A Novel Function of delta Factor from Bacillus  
45 subtilis as a Transcriptional Repressor. *J Biol Chem* **2016**, *291*, 24029-24035.
- 46 45. Wiedermannova, J.; Sudzinova, P.; Koval, T.; Rabatinova, A.; Sanderova, H.; Ramaniuk, O.;  
47 Rittich, S.; Dohnalek, J.; Fu, Z.; Halada, P.; Lewis, P.; Krasny, L., Characterization of Held, an  
48 interacting partner of RNA polymerase from Bacillus subtilis. *Nucleic Acids Res* **2014**, *42*, 5151-63.
- 49 46. Nicolas, P.; Mader, U.; Dervyn, E.; Rochat, T.; Leduc, A.; Pigeonneau, N.; Bidnenko, E.;  
50 Marchadier, E.; Hoebeke, M.; Aymerich, S.; Becher, D.; Bisicchia, P.; Botella, E.; Delumeau, O.;  
51 Doherty, G.; Denham, E. L.; Fogg, M. J.; Fromion, V.; Goelzer, A.; Hansen, A.; Hartig, E.; Harwood, C.  
52 R.; Homuth, G.; Jarmer, H.; Jules, M.; Klipp, E.; Le Chat, L.; Lecoite, F.; Lewis, P.; Liebermeister, W.;

- 1 March, A.; Mars, R. A.; Nannapaneni, P.; Noone, D.; Pohl, S.; Rinn, B.; Rugheimer, F.; Sappa, P. K.;  
2 Samson, F.; Schaffer, M.; Schwikowski, B.; Steil, L.; Stulke, J.; Wiegert, T.; Devine, K. M.; Wilkinson, A.  
3 J.; van Dijl, J. M.; Hecker, M.; Volker, U.; Bessieres, P.; Noirot, P., Condition-dependent transcriptome  
4 reveals high-level regulatory architecture in *Bacillus subtilis*. *Science* **2012**, *335*, 1103-6.
- 5 47. Weiss, A.; Shaw, L. N., Small things considered: the small accessory subunits of RNA  
6 polymerase in Gram-positive bacteria. *FEMS Microbiol Rev* **2015**, *39*, 541-54.
- 7 48. Lopez de Saro, F. J.; Woody, A. Y.; Helmann, J. D., Structural analysis of the *Bacillus subtilis*  
8 delta factor: a protein polyanion which displaces RNA from RNA polymerase. *J Mol Biol* **1995**, *252*,  
9 189-202.
- 10 49. Papouskova, V.; Kaderavek, P.; Otrusina, O.; Rabatinova, A.; H, S. S.; Novacek, J.; Krasny, L.;  
11 Sklenar, V.; Zidek, L., Structural study of the partially disordered full-length delta subunit of RNA  
12 polymerase from *Bacillus subtilis*. *Chembiochem* **2013**, *14*, 1772-9.
- 13 50. Doherty, G. P.; Fogg, M. J.; Wilkinson, A. J.; Lewis, P. J., Small subunits of RNA polymerase:  
14 localization, levels and implications for core enzyme composition. *Microbiology* **2010**, *156*, (Pt 12),  
15 3532-43.
- 16 51. Hyde, E. I.; Hilton, M. D.; Whiteley, H. R., Interactions of *Bacillus subtilis* RNA polymerase with  
17 subunits determining the specificity of initiation. Sigma and delta peptides can bind simultaneously  
18 to core. *J Biol Chem* **1986**, *261*, 16565-70.
- 19 52. Lopez de Saro, F. J.; Yoshikawa, N.; Helmann, J. D., Expression, abundance, and RNA  
20 polymerase binding properties of the delta factor of *Bacillus subtilis*. *J Biol Chem* **1999**, *274*, 15953-8.
- 21 53. Motackova, V.; Sanderova, H.; Zidek, L.; Novacek, J.; Padrta, P.; Svenkova, A.; Korelusova, J.;  
22 Jonak, J.; Krasny, L.; Sklenar, V., Solution structure of the N-terminal domain of *Bacillus subtilis* delta  
23 subunit of RNA polymerase and its classification based on structural homologs. *Proteins* **2010**, *78*,  
24 1807-10.
- 25 54. Yang, B.; Wu, Y. J.; Zhu, M.; Fan, S. B.; Lin, J.; Zhang, K.; Li, S.; Chi, H.; Li, Y. X.; Chen, H. F.; Luo,  
26 S. K.; Ding, Y. H.; Wang, L. H.; Hao, Z.; Xiu, L. Y.; Chen, S.; Ye, K.; He, S. M.; Dong, M. Q., Identification  
27 of cross-linked peptides from complex samples. *Nat Methods* **2012**, *9*, 904-6.
- 28 55. Tan, D.; Li, Q.; Zhang, M. J.; Liu, C.; Ma, C.; Zhang, P.; Ding, Y. H.; Fan, S. B.; Tao, L.; Yang, B.;  
29 Li, X.; Ma, S.; Liu, J.; Feng, B.; Liu, X.; Wang, H. W.; He, S. M.; Gao, N.; Ye, K.; Dong, M. Q.; Lei, X.,  
30 Trifunctional cross-linker for mapping protein-protein interaction networks and comparing protein  
31 conformational states. *Elife* **2016**, *5*, e12509.
- 32 56. Chavez, J. D.; Weisbrod, C. R.; Zheng, C.; Eng, J. K.; Bruce, J. E., Protein interactions, post-  
33 translational modifications and topologies in human cells. *Mol Cell Proteomics* **2013**, *12*, 1451-67.
- 34 57. Liu, F.; Rijkers, D. T.; Post, H.; Heck, A. J., Proteome-wide profiling of protein assemblies by  
35 cross-linking mass spectrometry. *Nat Methods* **2015**, *12*, 1179-84.
- 36 58. Arlt, C.; Gotze, M.; Ihling, C. H.; Hage, C.; Schafer, M.; Sinz, A., Integrated Workflow for  
37 Structural Proteomics Studies Based on Cross-Linking/Mass Spectrometry with an MS/MS Cleavable  
38 Cross-Linker. *Anal Chem* **2016**, *88*, 7930-7937
- 39 59. Syka, J. E.; Coon, J. J.; Schroeder, M. J.; Shabanowitz, J.; Hunt, D. F., Peptide and protein  
40 sequence analysis by electron transfer dissociation mass spectrometry. *Proc Natl Acad Sci U S A*  
41 **2004**, *101*, 9528-33.

42

43

1 FIGURE LEGENDS

2

3 **Figure 1.** In vivo cross-linking in of *B. subtilis* in culture. **a**, Growth curves of *B. subtilis* in  
4 minimal medium with 1.2 mM glutamine (filled diamonds) and 5 mM glutamine (open  
5 squares); **b**, SDS-PAGE analysis of in vivo cross-linking with BAMG and DSG of exponentially  
6 growing *B. subtilis* directly in the growth medium. Control, soluble proteins from untreated  
7 exponentially growing *B. subtilis*. 2 mM BAMG or DSG, soluble proteins from exponentially  
8 growing *B. subtilis* treated with 2 mM BAMG or DSG, respectively. Molecular weights (kDa)  
9 are shown on the left hand side adjacent to pre-stained molecular weight markers (MW  
10 markers).

11

12 **Figure 2.** Workflow for peptide level identification of protein cross-links introduced by BAMG  
13 in exponentially growing *B. subtilis*. **a**, overview; **b**, left part, reaction products formed (1) in  
14 the cross-link reaction with BAMG, (2) by TCEP-induced reduction and (3) by cross-link amide  
15 bond cleavages and peptide bond cleavages by collision with gas molecules during LC-  
16 MS/MS leading to formation of unmodified peptide ions and peptide ions modified by the  
17 cross-linker remnant in the form of a  $\gamma$ -lactam, along with b and y ions. A, peptide A; B,  
18 peptide B. Depicted peptide charge states after (1) and (2) are calculated for pH 3, assuming  
19 full protonation of basic amino acids and carboxylic acids. Depicted charge states in the gas  
20 phase after (3) are arbitrary, assuming a net charge state of +4 of the intact precursor ion.  
21 Right part of panel **b**, principles of isolation of cross-linked peptides by diagonal strong  
22 cation exchange (DSCX) chromatography. After digestion, the peptide mixture from a protein  
23 extract is fractionated by SCX chromatography, using a mobile phase of pH 3 and a salt  
24 gradient of ammonium formate to elute bound peptides (1st run). Cyan, cross-linked

1 peptides; grey, unmodified peptides. Subsequently, fractions containing cross-linked  
2 peptides are treated with TCEP to reduce the azido group to an amine group, which  
3 becomes protonated at pH 3, adding one positive charge to cross-linked peptides. TCEP-  
4 treated fractions are then separately subjected to a second run of diagonal chromatography.  
5 The change in chromatographic behavior caused by the charge increase of cross-linked  
6 peptides leads to their separation from the bulk of unmodified peptides present in the same  
7 primary SCX fraction.

8

9 **Figure 3.** Overview of identification and validation of cross-linked peptides by mass  
10 spectrometry and database searching. A, B, A<sub>m</sub>, B<sub>m</sub>, free peptides A and B and peptides A  
11 and B modified by the cross-linker in the form of a  $\gamma$ -lactam; M<sub>A</sub>, M<sub>B</sub>, M<sub>A<sub>m</sub></sub>, M<sub>B<sub>m</sub></sub>, masses of  
12 peptides A and B and their  $\gamma$ -lactam modifications; M<sub>P</sub>, precursor mass; f<sub>assigned</sub>, total number  
13 of assigned fragment ions; f<sub>total</sub>, total number of fragment ions of highest intensity taken into  
14 account with a minimum of 10 and a maximum of 40 fragments; total<sub>decoy</sub>, total number of  
15 assigned decoy peptides; total<sub>target</sub>, total number of assigned target peptides.

16 **Figure 4.** Mass spectrum of product ions generated by collision induced dissociation of a  
17 precursor ion of a BAMG-cross-linked peptide pair. The spectrum shows characteristic  
18 features of the fragmentation pattern of a cross-linked peptide in which the azido group in  
19 the spacer of the cross-linker has been reduced to an amine group. These features are (i)  
20 signals of high intensity resulting from cleavage of the cross-linked amide bonds leading to  
21 unmodified peptide A (CA) and peptide A modified by the remnant of the cross-linker in the  
22 form of a  $\gamma$ -lactam (CA<sub>m</sub>), adding 125.0477 Da to the mass of peptide and (ii) secondary  
23 fragments resulting from cleavage of a cross-linked amide bond along with peptide bond  
24 cleavages of an unmodified peptide (blue, subscript A<sub>n</sub>, B<sub>n</sub>) or a peptide lactam (red,

1 subscript Am, Bm). These secondary cleavages occur along with primary cleavages of the  
2 peptide bonds (black, subscript A, B). The presence of both primary fragments (resulting  
3 from cleavages of the cross-link amide bonds and peptide bonds) and secondary fragments  
4 tremendously facilitates identification of cross-linked peptides according to the work flow  
5 schematically depicted in Fig. 3b. \*, fragment with NH<sub>3</sub> loss.

6 **Figure 5.** Model of *B. subtilis* RNAP in complex with  $\delta$ . **a**, a zoomed region of  $\delta$  (blue) located  
7 within the DNA binding cleft of RNAP (grey). The cross-linked amino acids are shown in red  
8 and the distances in Å between the  $\alpha$  carbon of  $\delta$  K48 and RNAP  $\beta'$  K208, K1104 and K1152  
9 indicated. **b**, a model of RNAP (grey) in complex with  $\delta$  (blue) with  $\sigma$  region 1.1 (purple) and  
10 DNA (green, template strand; orange, non-template strand) shown as semi-transparent  
11 cartoons. The active site Mg<sup>2+</sup> is shown as a cyan sphere and RNA as a red cartoon. (Part of)  
12 the unstructured C-terminal domain, attached at the C-terminal end of the structured N-  
13 terminal domain, is depicted as a yellow squiggle pointing in the direction of the RNA export  
14 channel. **c**, compilation of all 10 docked models (all cyan) with the C-terminal 5 amino acids  
15 of the structured N-terminal domain colored red.

16

17

18

19

20

21

22

23

1 Table 1. Inter-protein cross-linked peptides from proteins involved in transcription and  
2 translation

| Mass (Da) | sequence peptide A | uniprot entry name | position XL residue | sequence peptide B                                   | uniprot entry name | position XL residue | (template) pdb file model | distance (Å) in structure model |
|-----------|--------------------|--------------------|---------------------|------------------------------------------------------|--------------------|---------------------|---------------------------|---------------------------------|
| 1788.0    | XSLEEVK            | RPOA               | 294                 | XSLEEVK                                              | RPOA               | 294                 |                           | n.a.                            |
| 2194.2    | IXELGPR            | RSPB               | 112                 | DTXLGPEEITR                                          | RPOB               | 803                 |                           | n.a.                            |
| 2298.2    | MYLXEIGR           | SIGA               | 107                 | QLLSEXEYR                                            | RPOC               | 153                 | 4IGC                      | 16.1                            |
| 2527.4    | LLTVXIPVR          | GUDB               | 52                  | XDVVDEVYDQR                                          | NUSA               | 62                  |                           | n.a.                            |
| 2629.4    | IGAEVXDGDLLVGK     | RPOB               | 837                 | GYTPADANXR                                           | RPOA               | 155                 | 2O5I\$                    | 12.3                            |
| 2672.5    | XLALK#             | RPOA               | 84                  | VAVAANSLXNVTFTEEQR                                   | RPOC               | 545                 | 2O5I\$                    | 20.0                            |
| 2762.5    | AQEXVFPMTAEGK      | GREA               | 5                   | XGFTATVIPNR                                          | RPOB               | 156                 | 4WQT                      | n.a.                            |
| 2974.6    | DTXLGPEEITR        | RPOB               | 803                 | TLXPEKDLFCER                                         | RPOC               | 40                  | 2O5I\$                    | 12.7                            |
| 3026.6    | XGFTATVIPNR        | RPOB               | 156                 | DXQQEIVVQGAVETR                                      | RPOC               | 987                 | 2O5I\$                    | 21.1                            |
| 3066.7    | IAAQTAXQVVQTR      | NUSA               | 111                 | VTPXGVTELTAER                                        | RPOB               | 849                 |                           | n.a.                            |
| 3387.6    | VTPXGVTELTAER      | RPOB               | 849                 | IFGPTXDWECHCGK                                       | RPOC               | 56                  | 2O5I\$                    | 14.4                            |
| 3510.8    | LVPAGTGMMXYR       | RPOC               | 1179                | ALEEIDAGLLSFXEDRE                                    | RPOZ               | 63                  | 2O5I\$                    | 13.8                            |
| 3780.0    | XEELGDR            | RPOE               | 48                  | VIDAGDTPVPGTLLDIHQFTEANXK                            | RPOC               | 1104                |                           | n.a.                            |
| 4572.3    | GILAKPLXEGTETIER   | RPOC               | 830                 | SFGDLSENSEYDSAXEEQAFVEGR                             | GREA               | 55                  | 4WQT                      | 28.0                            |
| 4695.7    | IGAEVXDGDLLVGK     | RPOB               | 837                 | GYTPADANXRDDQPQIPVIPSIIYTPVSR                        | RPOA               | 155                 | 2O5I\$                    | 12.3                            |
| 6461.1    | DTXLGPEEITR        | RPOB               | 803                 | EILXIAQEPVSLPETPIGEEDDSSLGDF-<br>IEDQEATSPSDHAAYELLK | SIGA               | 258                 | 4IGC                      | 11.6                            |
| 1694.0    | VIXVVR             | RL7                | 73                  | GPXGELTR                                             | RL6                | 31                  |                           | n.a.                            |
| 1838.1    | XEVVQLK            | RS2                | 132                 | GEVLPTXK                                             | RS3                | 210                 | 3J9W                      | 22.3                            |
| 1947.0    | DIIDLK             | RS13               | 62                  | QXFASADGR                                            | RL31               | 48                  |                           | n.a.                            |
| 2083.2    | GXILPR             | RS18               | 43                  | SVSXTGTLQEAR                                         | RS21               | 25                  |                           | n.a.                            |
| 2217.2    | XFVSR              | RS18               | 36                  | IDPSXLELEER                                          | RS5                | 8                   | 3J9W                      | 86.2                            |
| 2383.4    | XAVIER#            | RS6                | 20                  | ILDQSAEXIVETAK                                       | RS10               | 24                  | 3J9W                      | 149.7                           |
| 2392.3    | AEDVAXLR           | RS5                | 155                 | VFLXYGQNNER                                          | RS8                | 65                  | 3J9W                      | 12.4                            |
| 2429.3    | XNEEGGK            | RS3                | 212                 | ILDQSAEXIVETAK                                       | RS10               | 24                  | 3J9W                      | < 20.9*                         |
| 2433.3    | XFVSR              | RS18               | 36                  | ILDQSAEXIVETAK                                       | RS10               | 24                  | 3J9W                      | 116.1                           |
| 2438.3    | GEVLPTXK           | RS3                | 210                 | VXVLDVNENEER                                         | RS1H               | 326                 |                           | n.a.                            |
| 2457.3    | ILDQSAEXIVETAKR    | RS10               | 24                  | NEEGGX                                               | RS3                | 218                 |                           | n.a.                            |
| 2498.5    | XALNSLTGK          | RS3                | 88                  | VXVLDVNENEER                                         | RS1H               | 326                 |                           | n.a.                            |
| 2500.3    | GIVTXVEDK          | RS1H               | 25                  | QAQDSVXEEAQR                                         | RS2                | 81                  |                           | n.a.                            |
| 2539.4    | GEVLPTXK           | RS3                | 210                 | ILDQSAEXIVETAK                                       | RS10               | 24                  | 3J9W                      | 18.5                            |
| 2557.4    | XKNEEGGK           | RS3                | 211                 | ILDQSAEXIVETAK                                       | RS10               | 24                  | 3J9W                      | 16.9                            |
| 2571.4    | XALNSLTGK          | RS3                | 88                  | XQAQDSVKEEAQR                                        | RS2                | 74                  | 3J9W                      | 87.4                            |
| 2654.4    | EITGLGLXEAKE       | RL7                | 84                  | XAAGIESGSGEPNR                                       | RL11               | 81                  |                           | n.a.                            |
| 2701.6    | VXVVK              | RL11               | 7                   | MLVITPYDXTAIGDIEK                                    | RRF                | 72                  |                           | n.a.                            |
| 2725.4    | GPQAANVTXEA        | CSPB               | 65                  | XQAQDSVKEEAQR                                        | RS2                | 74                  |                           | n.a.                            |
| 2728.5    | SVSXTGTLQEAR       | RS21               | 25                  | IDPSXLELEER                                          | RS5                | 8                   |                           | n.a.                            |
| 2733.4    | XNESLEDALR         | RS21               | 8                   | XLSEYGLQLQEK                                         | RS4                | 43                  |                           | n.a.                            |
| 2739.4    | YEVGEGIEXR         | EFTS               | 278                 | AEVYVLSXEEGGR                                        | EFTU               | 316                 | 1EFU                      | 18.6                            |
| 2749.4    | ELVDNTPXPLK        | RL7                | 95                  | XAAGIESGSGEPNR                                       | RL11               | 81                  |                           | n.a.                            |
| 2845.5    | AXLSGTAERPR        | RL18               | 21                  | GGDDTLFAXIDGTVK                                      | RL28               | 70                  |                           | n.a.                            |
| 2861.5    | XNESLEDALR         | RS21               | 8                   | XKLSEYGLQLQEK                                        | RS4                | 42                  |                           | n.a.                            |
| 2881.5    | IDPSXLELEER        | RS5                | 8                   | VXVLSVDRDNER                                         | RS1H               | 240                 |                           | n.a.                            |
| 2882.6    | IAXIEVVR           | RL19               | 83                  | XLLDYAEAGDNIGALLR                                    | EFTU               | 266                 |                           | n.a.                            |
| 3080.6    | VHINILEIXR         | RS3                | 106                 | ELEETPXADQEDYR                                       | RS1H               | 349                 |                           | n.a.                            |
| 3153.8    | EAXELVDNTPKPLK     | RL7                | 87                  | LALETGTAFIEXR                                        | MTNK               | 377                 |                           | n.a.                            |
| 3184.7    | XQAQDSVKEEAQR      | RS2                | 74                  | ILDQSAEXIVETAK                                       | RS10               | 24                  | 3J9W                      | 75.4                            |
| 3427.8    | EAXELVDNTPKPLK     | RL7                | 87                  | SLLGNMVEGVXGFER                                      | RL6                | 82                  |                           | n.a.                            |
| 3524.8    | VNITHTAXPGMIVIGK   | RS1                | 71                  | ELEETPXADQEDYR                                       | RS1H               | 349                 |                           | n.a.                            |
| 3789.9    | EAXELVDNTPKPLK     | RL7                | 87                  | AXEAEAAGADVFVGDTDYINK                                | RL1                | 85                  |                           | n.a.                            |

3 X, cross-linked K residue; \*, linked residue K212 (RS3) is not in structure model; distance is  
4 assumed based on a maximal distance of 4 Å between Cα atoms of K211 and K212.#,  
5 sequence also occurs in other unrelated proteins; \$, the structure of the RNAP elongation  
6 complex was modelled as described Methods; n.a., model not available or linked residue not  
7 in structure. Uniprot entry names RPOA, RPOB, RPOC, RPOE and RPOZ, correspond to  
8 subunits α, β, β', δ and ω of RNAP

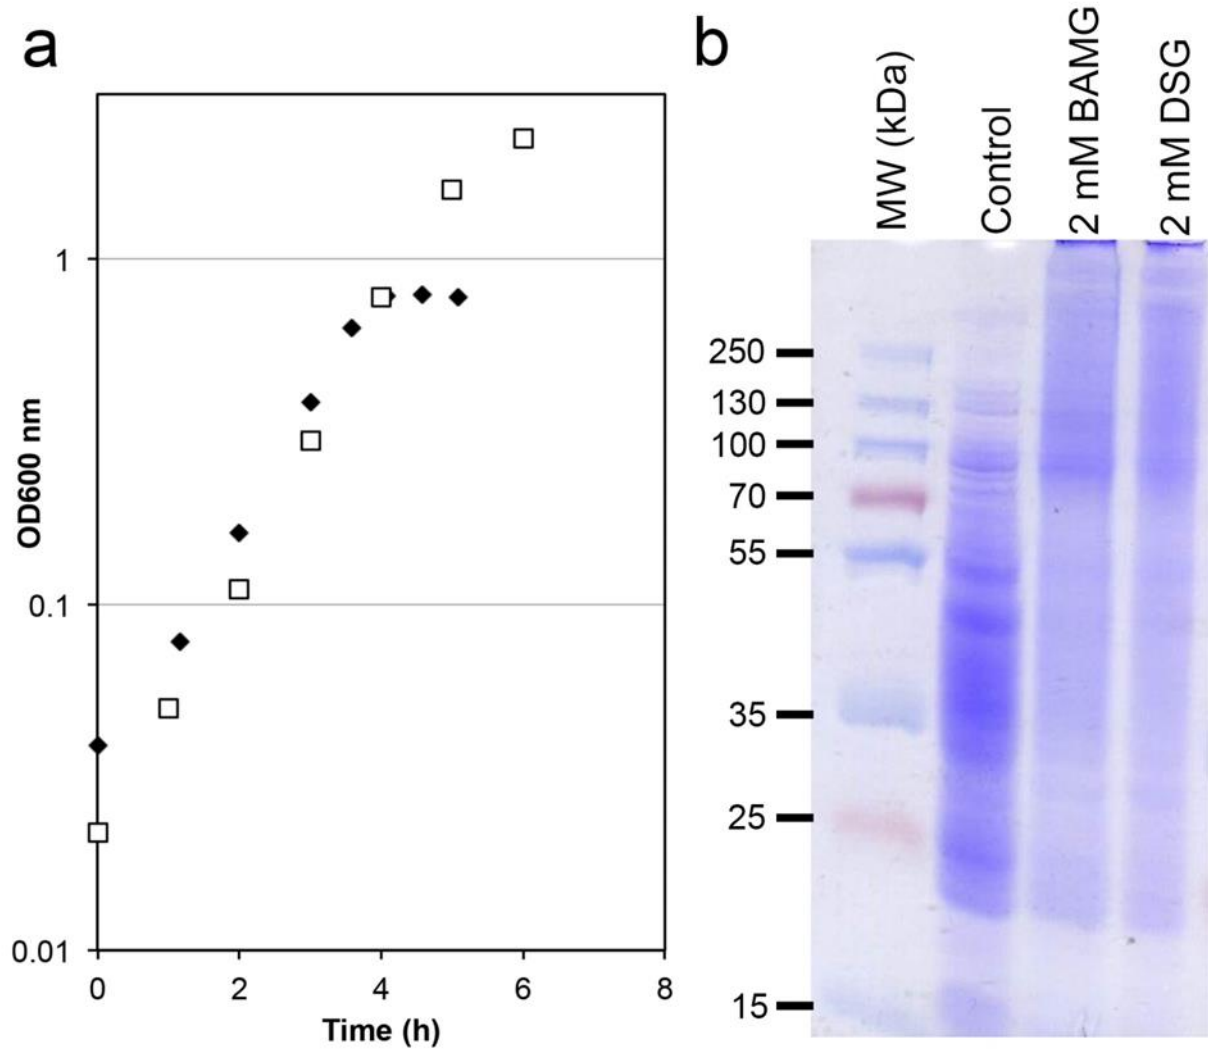

Figure 1

1

2



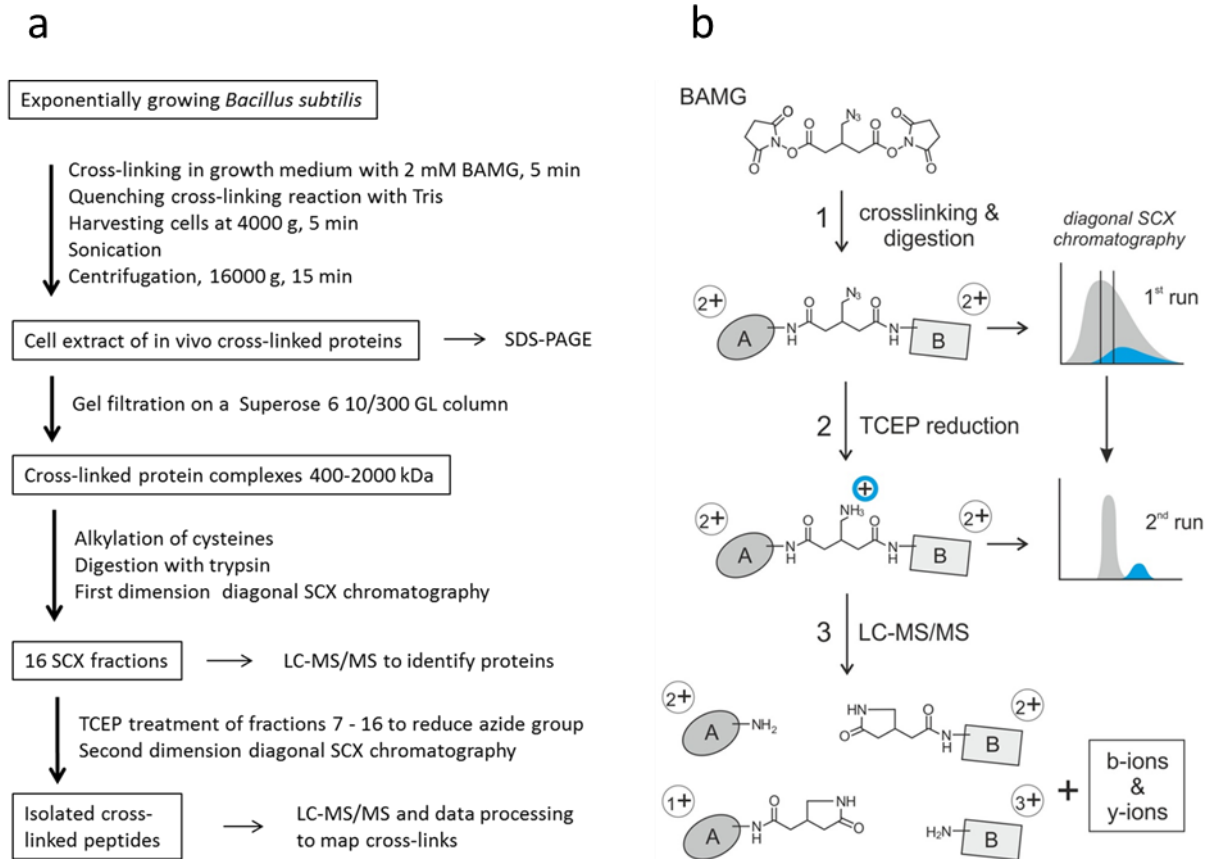

Figure 2

1

2

1. Use MASCOT DISTILLER to process raw LC-MS/MS (LC-MS1MS2) data of diagonal SCX chromatography fractions enriched in cross-linked peptides
2. Use the software tool REANG to identify possible mass signals for peptide A, Am, B and Bm by application of the mass equations to processed M1MS2 files
3. Convert entries in original MS1MS2 file by (i) replacing  $M_p$  (M1) values by new M1 values corresponding to  $M_A$ ,  $M_{Am}$ ,  $M_B$  and  $M_{Bm}$  and (ii) removing of M2 values exceeding the new M1 mass values
4. Identify possible candidate peptides A, Am, B and Bm using MASCOT for interrogation of the entire *B. subtilis* database of both forward and reversed (decoy) sequences with the new MS/MS files
5. Generate candidate cross-linked peptides from candidate peptides A or Am and B or Bm nominated by MASCOT
6. Validate candidates using YEUN YAN by applying criteria for assignment of interprotein or intraprotein cross-linked peptides

Mass equations used by REANG

$$M_{Am} - M_A = 125.0477$$

$$M_A + M_B = M_p - 125.0477$$

$$M_{Am} + M_{Bm} = M_p + 125.0477$$

Criteria for assignment of interprotein cross-link candidates

- YY score  $\geq 40$
- Number of assigned y ions:  $\geq 3$  for peptides A and B with  $\leq 10$  amino acids and  $\geq 4$  for peptides A and B with  $\geq 11$  amino acids
- Highest scoring candidate for a given precursor ion

Criteria for assignment of intraprotein cross-link candidates

- YY score  $\geq 40$
- Number of assigned y ions:  $\geq 1$  for peptides A and B
- Highest scoring candidate for a given precursor ion

Yeun Yan score

YY score =

$$(f_{assigned}/f_{total}) \times 100$$

False discovery rate (FDR)

$$FDR = \{total_{decoy}/(total_{target} + total_{decoy})\} \times 100\%$$

Figure 3

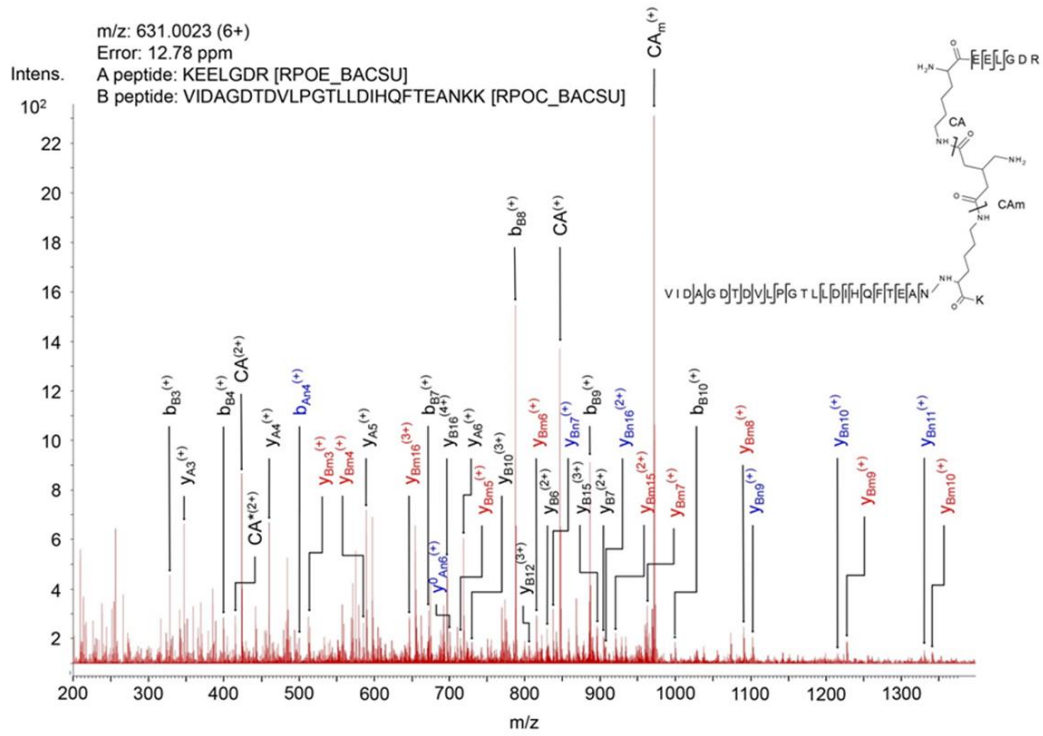

Figure 4

1

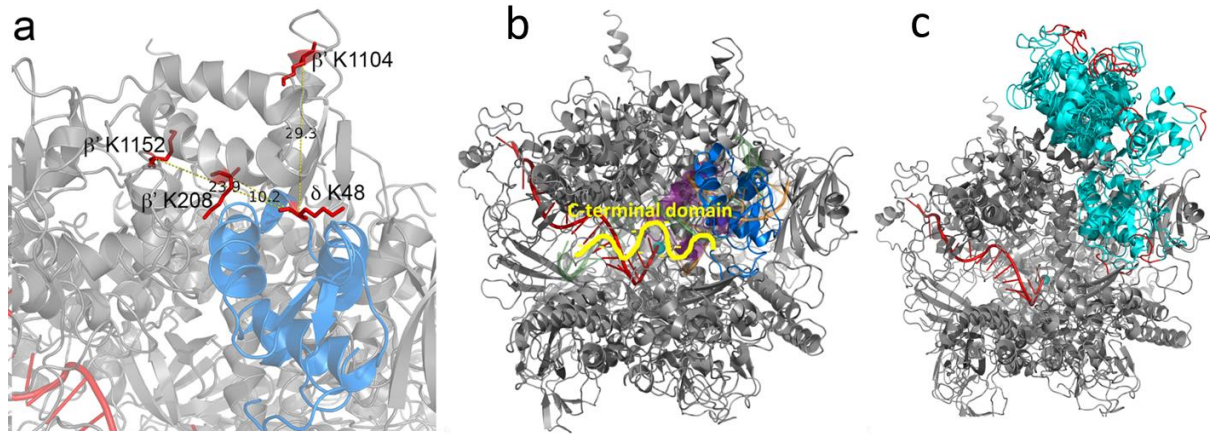

Figure 5

1
